# Supplementary material for: Chiral fluorescent sensors based on cellulose derivatives bearing terthienyl pendants
Source: Royal Society of Chemistry journal article supplement (doi:10.1039/c6py00967k), 2016-01-01
Supplement: c6py00967k1.pdf [file c6py00967k1.pdf]

*Supplementary Information for:*

## **Chiral fluorescent sensors based on cellulose derivatives bearing terthienyl pendants**

Tomoyuki Ikai,\* Daisuke Suzuki, Yutaka Kojima, Changsik Yun,  
Katsuhiko Maeda and Shigeyoshi Kanoh

Graduate School of Natural Science and Technology, Kanazawa University, Kakuma-machi,  
Kanazawa 920-1192, Japan

\*To whom correspondence should be addressed. E-mail: ikai@se.kanazawa-u.ac.jp.

### **Table of content:**

|                   |       |      |
|-------------------|-------|------|
| 1. Materials      | ..... | S-2  |
| 2. Instruments    | ..... | S-2  |
| 3. Synthesis      | ..... | S-3  |
| Supporting data   | ..... | S10  |
| NMR spectral data | ..... | S-19 |
| Reference         | ..... | S-40 |

## 1. Materials

Anhydrous solvents (toluene, *N,N*-dimethylformamide (DMF), dichloromethane and tetrahydrofuran (THF)) and common organic solvents were purchased from Kanto Kagaku (Tokyo, Japan). 2-Bromothiophene was from Tokyo Kasei Kogyo (TCI) (Tokyo, Japan). 2-Iodothiophene (**3a**), tributyltin chloride, tetra-*n*-butylammonium fluoride (1.0 M in THF) and copper (I) iodide (CuI) were from Sigma-Aldrich (St. Louis, MO, USA). (Triisopropylsilyl)acetylene, *trans*-dichlorobis(triphenylphosphine)palladium(II) (Pd(PPh<sub>3</sub>)<sub>2</sub>Cl<sub>2</sub>), 1-ethyl-3-(3-dimethylaminopropyl)carbodiimide hydrochloride (EDC-HCl), *N,N*-dimethyl-4-aminopyridine (DMAP) and *n*-butyllithium (1.6 M in *n*-hexane) were purchased from Wako Pure Chemical Industries (Osaka, Japan). Tetrakis(triphenylphosphine)palladium(0) (Pd(PPh<sub>3</sub>)<sub>4</sub>) was purchased from Nacalai (Kyoto, Japan). Triethylamine was obtained from Kishida (Osaka, Japan). All starting materials for the synthesis of aromatic nitro compounds and their analogues (**5–9**) were purchased from Nacalai, Wako Pure Chemical Industries and TCI. 2-Bromo-5-(2-hexyldecyl)thiophene (**3f**) was prepared according to a literature procedure.<sup>1</sup>

## 2. Instruments

NMR spectra were taken on a JNA-LA 400 (JEOL, Tokyo, Japan) (400 MHz for <sup>1</sup>H) or a JNM-ECA 500 (JEOL) (500 MHz for <sup>1</sup>H, 125 MHz for <sup>13</sup>C) or a JNM-ECA 600 (JEOL) (600 MHz for <sup>1</sup>H) spectrometer in CDCl<sub>3</sub>, pyridine-*d*<sub>5</sub> and DMSO-*d*<sub>6</sub> using tetramethylsilane or a solvent residual peak as the internal standard. Melting points were measured on a Yanako melting point apparatus and were uncorrected. Microwave irradiation experiments were performed using an EYELA Wave Magic MWO-1000S (Tokyo Rikakikai, Tokyo, Japan). TGA was conducted with a TG/DTA6200 (SII NanoTechnology, Chiba, Japan) at a heating rate of 10 °C min<sup>-1</sup> under a nitrogen flow. IR spectra were obtained using a JASCO (Hachioji, Japan) Fourier Transform IR-460 spectrophotometer with a KBr pellet. Absorption and circular dichroism (CD) spectra were measured at 25 °C in a 1.0 or 10 mm quartz cell using a JASCO V-570 and a JASCO J-725 spectrometers, respectively. The temperature was controlled using a JASCO ETC-505T (absorption spectroscopy) and a JASCO PTC-348WI apparatus (CD spectroscopy). Dynamic light scattering (DLS) measurements were performed on a Nano partica SZ-100 (Horiba, Kyoto, Japan) equipped with a 10 mW a diode pumped solid state laser (532 nm)

at 25 °C. Fluorescence emission spectra were measured with a JASCO FP-6300. Elemental analyses were performed by the Research Institute for Instrumental Analysis of Advanced Science Research Center, Kanazawa University, Kanazawa, Japan.

### 3. Synthesis

2,2':5',2''-Terthiophene derivative (**3**) was prepared according to Scheme S1. Aromatic nitro compounds and their analogues (**5–9**) were synthesized through common condensation reactions using the corresponding amine or alcohol compounds as starting materials.

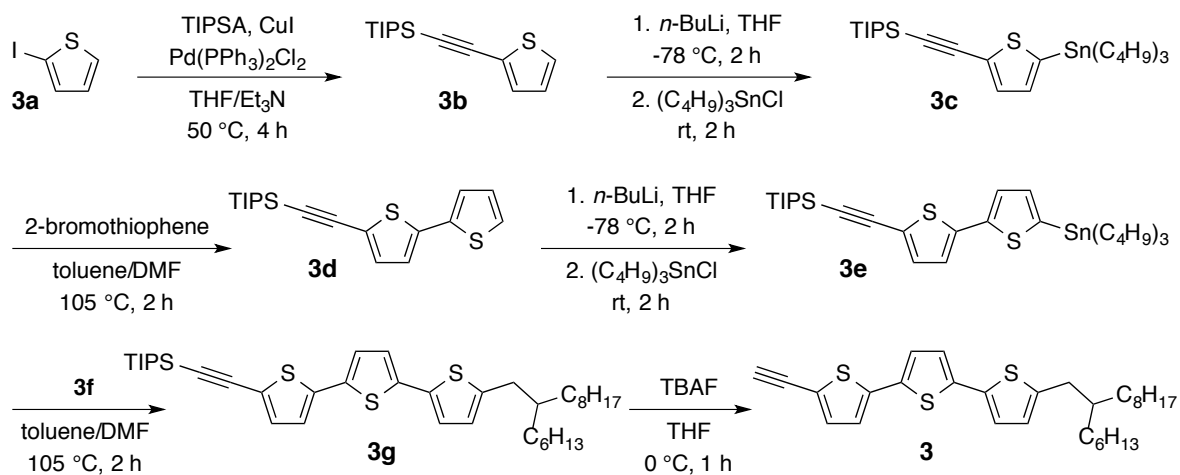

**Scheme S1** Synthesis of 2,2':5',2''-terthiophene derivative (**3**).

**2-[(Triisopropylsilyl)ethynyl]thiophene (3b).** To a solution of **3a** (20.0 g, 95.2 mmol), Pd(PPh<sub>3</sub>)<sub>2</sub>Cl<sub>2</sub> (3.34 g, 4.76 mmol) and CuI (0.91 g, 4.76 mmol) in degassed THF/triethylamine (3/1, v/v) (480 mL) was added (triisopropylsilyl)acetylene (22.3 mL, 99.9 mmol). The solution was stirred at 50 °C for 4 h. After cooling to room temperature, the reaction mixture was diluted with hexane and passed through Celite to remove the metal catalyst. The solution was washed with 1 N HCl aqueous solution and water, and then dried over Na<sub>2</sub>SO<sub>4</sub>. After removing the solvent by evaporation, the crude product was purified by silica gel chromatography using hexane as the eluent to give the desired product as a colorless oil (25.1 g, 99% yield). <sup>1</sup>H NMR (600 MHz, CDCl<sub>3</sub>, rt): δ 7.23-7.20 (m, 2H, Ar-H), 6.95 (dd, *J* = 5.0, 3.6 Hz, 1H, Ar-H), 1.14-1.10 (m, 21H, TIPS).

**2-(Tributyltin)-5-[(triisopropylsilyl)ethynyl]thiophene (3c).** To a solution of **3b** (25.1 g, 95.1 mmol) in anhydrous THF (338 mL) was added dropwise *n*-butyllithium (1.6

M in hexane, 62 mL, 99 mmol) via syringe at  $-78\text{ }^{\circ}\text{C}$  under nitrogen atmosphere. After the mixture was stirred at  $-78\text{ }^{\circ}\text{C}$  for 2 h, tributyltin chloride (30 mL, 110 mmol) was added. The mixture was warmed to room temperature and stirred for 2 h. After quenching the reaction with water, the volatile species were evaporated in vacuo. The residue was extracted with hexane, and the organic layer was washed with water, dried over anhydrous  $\text{Na}_2\text{SO}_4$  and concentrated. Compound **3c** (58.0 g) was obtained as a pale yellow oil and was used for the next step without further purification.  $^1\text{H}$  NMR (600 MHz,  $\text{CDCl}_3$ , rt):  $\delta$  7.33 (d,  $J = 3.0$  Hz, 1H, Ar-H), 6.99 (d,  $J = 3.6$  Hz, 1H, Ar-H), 1.68-1.50 (m, 6H,  $3\text{CH}_2$ ), 1.38-1.28 (m, 12H,  $6\text{CH}_2$ ), 1.14-1.09 (m, 21H, TIPS), 0.94-0.87 (m, 9H,  $3\text{CH}_3$ ).

**5-[(Triisopropylsilyl)ethynyl]-2,2'-bithiophene (3d)**. To a solution of **3c** (10.0 g) and 2-bromothiophene (2.95 g, 18.1 mmol) in toluene/DMF (4/1, v/v) (80 mL) was added  $\text{Pd}(\text{PPh}_3)_4$  (0.626 g, 0.542 mmol). The solution was stirred at  $105\text{ }^{\circ}\text{C}$  for 2 h under microwave heating. After cooling to room temperature, the reaction mixture was diluted with hexane, washed with water, and then dried over  $\text{Na}_2\text{SO}_4$ . After removing the solvent by evaporation, the crude product was purified by silica gel chromatography using hexane as the eluent to give the desired product as a pale yellow oil (4.03 g, 77% yield).  $^1\text{H}$  NMR (600 MHz,  $\text{CDCl}_3$ , rt):  $\delta$  7.23 (d,  $J = 4.8$  Hz, 1H, Ar-H), 7.17 (d,  $J = 3.8$  Hz, 1H, Ar-H), 7.12 (d,  $J = 3.8$  Hz, 1H, Ar-H), 7.01 (d,  $J = 3.8$  Hz, 2H, Ar-H), 1.13 (s, 21H, TIPS).

**5-(Tributyltin)-5'-[(triisopropylsilyl)ethynyl]-2,2'-bithiophene (3e)**. To a solution of **3d** (2.90 g, 8.37 mmol) in anhydrous THF (30 mL) was added dropwise *n*-butyllithium (1.6 M in hexane, 5.50 mL, 8.80 mmol) via syringe at  $-78\text{ }^{\circ}\text{C}$  under nitrogen atmosphere. After the mixture was stirred at  $-78\text{ }^{\circ}\text{C}$  for 2 h, tributyltin chloride (2.6 mL, 9.6 mmol) was added. The mixture was warmed to room temperature and stirred for 2 h. After quenching the reaction with water, the volatile species were evaporated in vacuo. The residue was extracted with hexane, and the organic layer was washed with water, dried over anhydrous  $\text{Na}_2\text{SO}_4$  and concentrated. Compound **3e** (7.88 g) was obtained as a yellow oil and was used for the next step without further purification.  $^1\text{H}$  NMR (500 MHz,  $\text{CDCl}_3$ , rt):  $\delta$  7.28 (d,  $J = 3.4$  Hz, 1H, Ar-H), 7.11 (d,  $J = 4.0$  Hz, 1H, Ar-H), 7.05 (d,  $J = 3.4$  Hz, 1H, Ar-H), 7.00 (d,  $J = 4.0$  Hz, 1H, Ar-H), 1.68-1.53 (m, 6H,  $3\text{CH}_2$ ), 1.40-1.30 (m, 12H,  $6\text{CH}_2$ ), 1.14-1.10 (m, 21H, TIPS), 0.93-0.88 (m, 9H,  $3\text{CH}_3$ ).

**5-(2-Hexyldecyl)-5'-[2-(triisopropylsilyl)ethynyl]-2,2':5',2''-terthiophene (3g)**. To a solution of **3e** (1.41 g) and **3f** (0.59 g, 2.1 mmol) in toluene/DMF (4/1, v/v) (8 mL) was



added Pd(PPh<sub>3</sub>)<sub>4</sub> (63 mg, 0.055 mmol). The solution was stirred at 105 °C for 4 h under microwave heating. After cooling to room temperature, the reaction mixture was diluted with hexane, washed with water, and then dried over Na<sub>2</sub>SO<sub>4</sub>. After removing the solvent by evaporation, the crude product was purified by silica gel chromatography using hexane as the eluent to give the desired product as a pale yellow oil (0.98 g, 71% yield). <sup>1</sup>H NMR (500 MHz, CDCl<sub>3</sub>, rt): δ 7.11 (d, *J* = 4.0 Hz, 1H, Ar-H), 7.04 (d, *J* = 4.0 Hz, 1H, Ar-H), 7.00-6.95 (m, 3H, Ar-H), 6.66 (d, *J* = 3.2 Hz, 1H, Ar-H), 2.72 (d, *J* = 6.9 Hz, 2H, Ar-CH<sub>2</sub>), 1.62 (br, 1H, CH), 1.37-1.19 (m, 24H, 12CH<sub>2</sub>), 1.11 (s, 21H, TIPS), 0.92-0.84 (m, 6H, 2CH<sub>3</sub>).

**5-(2-Hexyldecyl)-5''-ethynyl-2,2':5',2''-terthiophene (3).** To a solution of **3g** (0.98 g, 1.5 mmol) in THF (72 mL) was added tetra-*n*-butylammonium fluoride (1.0 M in THF, 2.2 mL, 2.2 mmol). The mixture was stirred at 0 °C for 1 h and was diluted with dichloromethane. The solution was washed with 1 N HCl aqueous solution and water, and then dried over Na<sub>2</sub>SO<sub>4</sub>. After filtration, the solvent was removed under reduced pressure and the crude product was then purified by silica gel chromatography using *n*-hexane–dichloromethane (9/1, v/v) as the eluent to give the desired product as a yellow solid (0.56 g, 75% yield). <sup>1</sup>H NMR (500 MHz, CDCl<sub>3</sub>, rt): δ 7.17 (d, *J* = 3.7 Hz, 1H, Ar-H), 7.06 (d, *J* = 3.7 Hz, 1H, Ar-H), 6.99 (d, *J* = 3.7 Hz, 3H, Ar-H), 6.66 (d, *J* = 3.2 Hz, 1H, Ar-H), 3.40 (s, 1H, C≡CH), 2.72 (d, *J* = 6.9 Hz, 2H, CH<sub>2</sub>), 1.60 (br, 1H, CH), 1.37-1.07 (m, 24H, 12CH<sub>2</sub>), 1.00-0.57 (m, 6H, 2CH<sub>3</sub>). <sup>13</sup>C NMR (125 MHz, CDCl<sub>3</sub>, rt): δ 144.59, 139.11, 137.80, 134.37, 133.96, 125.97, 124.97, 123.58, 123.50, 122.88, 120.36, 82.26, 76.92, 39.96, 34.58, 33.19, 33.15, 31.90, 31.88, 29.93, 29.61, 29.32, 26.58, 22.68, 14.12. IR (KBr, cm<sup>-1</sup>): 3307 (≡CH), 2100 (C≡C). Calcd for C<sub>30</sub>H<sub>40</sub>S<sub>3</sub>·0.1H<sub>2</sub>O: C, 72.26; H, 8.13. Found: C, 71.99; H, 8.04.

**(-)-*N*-(4-Nitrobenzoyl)-D-alanine methyl ester ((*R*)-5a).** D-Alanine methyl ester hydrochloride (0.75 g, 5.4 mmol) and triethylamine (1.5 mL, 10.8 mmol) were dissolved in anhydrous THF (15 mL) and the solution was cooled to 0 °C. To this solution was added 4-nitrobenzoyl chloride (1.0 g, 5.4 mmol) dissolved in THF (15 mL) and the mixture was stirred at rt for 2 h. The mixture was diluted with THF, washed with brine, and then dried over Na<sub>2</sub>SO<sub>4</sub>. The solvent was removed under reduced pressure and the crude product was purified by silica gel chromatography using hexane–ethyl acetate (1/2, v/v) as the eluent, followed by recrystallization from a hexane–ethyl acetate mixture to give the desired

product as a white solid (0.99 g, 73% yield). Mp: 137.7–138.1 °C.  $[\alpha]_D^{25}$  -4.1 (*c* 1.0, CHCl<sub>3</sub>). <sup>1</sup>H NMR (600 MHz, CDCl<sub>3</sub>, rt): δ 8.34-8.28 (m, 2H, Ar-H), 8.01-7.95 (m, 2H, Ar-H), 6.81 (d, *J* = 5.5 Hz, 1H, NH), 4.84-4.77 (m, 1H, CH), 3.82 (s, 3H, OCH<sub>3</sub>), 1.56 (s, 3H, CH<sub>3</sub>). <sup>13</sup>C NMR (125 MHz, CDCl<sub>3</sub>, rt): δ 173.37, 164.75, 149.76, 139.43, 128.29, 123.87, 52.83, 48.79, 18.56. IR (KBr, cm<sup>-1</sup>): 3296 (N-H), 1741 (C=O). Calcd for C<sub>11</sub>H<sub>12</sub>N<sub>2</sub>O<sub>5</sub>: C, 52.38; H, 4.80; N, 11.11. Found: C, 52.23; H, 4.89; N, 11.11.

**(+)-*N*-(4-Nitrobenzoyl)-L-alanine methyl ester ((*S*)-5a).** The title compound was prepared from L-alanine methyl ester hydrochloride in the same way as (*R*)-5a and obtained in 66% yield as a white solid. Mp: 137.9–138.4 °C.  $[\alpha]_D^{25}$  +4.1 (*c* 1.0, CHCl<sub>3</sub>). <sup>1</sup>H NMR (600 MHz, CDCl<sub>3</sub>, rt): δ 8.35-8.28 (m, 2H, Ar-H), 8.01-7.95 (m, 2H, Ar-H), 6.81 (d, *J* = 5.8 Hz, 1H, NH), 4.84-4.77 (m, 1H, CH), 3.82 (s, 3H, OCH<sub>3</sub>), 1.57 (s, 3H, CH<sub>3</sub>). <sup>13</sup>C NMR (125 MHz, CDCl<sub>3</sub>, rt): δ 173.37, 164.75, 149.77, 139.43, 128.29, 123.87, 52.83, 48.79, 18.56. IR (KBr, cm<sup>-1</sup>): 3293 (N-H), 1741 (C=O). Calcd for C<sub>11</sub>H<sub>12</sub>N<sub>2</sub>O<sub>5</sub>: C, 52.38; H, 4.80; N, 11.11. Found: C, 52.37; H, 4.79; N, 11.12.

***N*-(4-Nitrobenzoyl)-DL-alanine methyl ester (*rac*-5a).** The title compound was prepared from DL-alanine methyl ester hydrochloride in the same way as (*R*)-5a and obtained in 43% yield as a white solid. Mp: 129.4–129.9 °C. <sup>1</sup>H NMR (500 MHz, CDCl<sub>3</sub>, rt): δ 8.34-8.28 (m, 2H, Ar-H), 8.01-7.95 (m, 2H, Ar-H), 6.81 (d, *J* = 6.9 Hz, 1H, NH), 4.85-4.77 (m, 1H, CH), 3.82 (s, 3H, OCH<sub>3</sub>), 1.59-1.54 (m, 3H, CH<sub>3</sub>). <sup>13</sup>C NMR (125 MHz, CDCl<sub>3</sub>, rt): δ 173.39, 164.81, 149.73, 139.42, 128.33, 123.85, 52.84 (q, *J* = 8.4 Hz), 48.79 (d, *J* = 9.6 Hz), 18.49 (d, *J* = 3.5 Hz). IR (KBr, cm<sup>-1</sup>): 3296 (N-H), 1736 (C=O). Calcd for C<sub>11</sub>H<sub>12</sub>N<sub>2</sub>O<sub>5</sub>: C, 52.38; H, 4.80; N, 11.11. Found: C, 52.18; H, 4.80; N, 11.11.

***N*-Benzoyl-DL-alanine methyl ester (*rac*-5b).** The title compound was prepared from DL-alanine methyl ester hydrochloride and benzoyl chloride in the same way as (*R*)-5a and obtained in 26% yield as a white solid. Mp: 81.8–82.0 °C. <sup>1</sup>H NMR (500 MHz, CDCl<sub>3</sub>, rt): δ 7.81 (d, *J* = 7.4 Hz, 2H, Ar-H), 7.55-7.49 (m, 1H, Ar-H), 7.48-7.42 (m, 2H, Ar-H), 6.78-6.64 (br, 1H, NH), 4.86-4.76 (m, 1H, CH), 3.80 (s, 3H, OCH<sub>3</sub>), 1.53 (d, *J* = 7.4 Hz, 3H, CH<sub>3</sub>). <sup>13</sup>C NMR (125 MHz, CDCl<sub>3</sub>, rt): δ 173.69, 166.75, 133.91, 131.73, 128.58, 127.01, 52.59, 48.45, 18.70. IR (KBr, cm<sup>-1</sup>): 3307 (N-H), 1751 (C=O). Calcd for C<sub>11</sub>H<sub>13</sub>NO<sub>3</sub>: C, 63.76; H, 6.32; N, 6.76. Found: C, 63.47; H, 6.32; N, 6.76.

**(-)-*N*-(4-Nitrobenzoyl)-D-valine methyl ester ((*R*)-6).** The title compound was

prepared from D-valine methyl ester hydrochloride in the same way as (*R*)-**5a** and obtained in 56% yield as a white solid. Mp: 125.8–126.2 °C.  $[\alpha]_D^{25}$  –4.6 (*c* 1.0, CHCl<sub>3</sub>). <sup>1</sup>H NMR (500 MHz, CDCl<sub>3</sub>, rt): δ 8.34–8.29 (m, 2H, Ar-H), 8.00–7.94 (m, 2H, Ar-H), 6.68 (d, *J* = 8.6 Hz, 1H, NH), 4.83–4.76 (m, 1H, CH), 3.81 (s, 3H, OCH<sub>3</sub>), 2.37–2.25 (m, 1H, CH), 1.02 (dd, *J* = 11.5, 6.9 Hz, 6H, 2CH<sub>3</sub>). <sup>13</sup>C NMR (125 MHz, CDCl<sub>3</sub>, rt): δ 172.38, 165.32, 149.73, 139.67, 128.30, 123.89, 57.70, 52.51, 31.62, 19.00, 17.97. IR (KBr, cm<sup>-1</sup>): 3255 (N-H), 1747 (C=O). Calcd for C<sub>13</sub>H<sub>16</sub>N<sub>2</sub>O<sub>5</sub>: C, 55.71; H, 5.75; N, 10.00. Found: C, 55.49; H, 5.68; N, 9.94.

**(+)-*N*-(4-Nitrobenzoyl)-L-valine methyl ester ((*S*)-6).** The title compound was prepared from L-valine methyl ester hydrochloride in the same way as (*R*)-**5a** and obtained in 67% yield as a white solid. Mp: 125.7–126.0 °C.  $[\alpha]_D^{25}$  +4.3 (*c* 1.0, CHCl<sub>3</sub>). <sup>1</sup>H NMR (500 MHz, CDCl<sub>3</sub>, rt): δ 8.36–8.28 (m, 2H, Ar-H), 8.02–7.94 (m, 2H, Ar-H), 6.69 (d, *J* = 8.0 Hz, 1H, NH), 4.82–4.76 (m, 1H, CH), 3.81 (s, 3H, OCH<sub>3</sub>), 2.36–2.26 (m, 1H, CH), 1.02 (dd, *J* = 11.5, 6.9 Hz, 6H). <sup>13</sup>C NMR (125 MHz, CDCl<sub>3</sub>, rt): δ 172.38, 165.32, 149.73, 139.67, 128.30, 123.89, 57.70, 52.51, 31.62, 19.00, 17.97. IR (KBr, cm<sup>-1</sup>): 3255 (N-H), 1747 (C=O). Calcd for C<sub>13</sub>H<sub>16</sub>N<sub>2</sub>O<sub>5</sub>: C, 55.71; H, 5.75; N, 10.00. Found: C, 55.60; H, 5.77; N, 9.99.

**(–)-*N*-(4-Nitrobenzoyl)-D-leucine methyl ester ((*R*)-7).** The title compound was prepared from D-leucine methyl ester hydrochloride in the same way as (*R*)-**5a** and obtained in 70% yield as a white solid. Mp: 106.6–106.9 °C.  $[\alpha]_D^{25}$  –2.6 (*c* 1.0, CHCl<sub>3</sub>). <sup>1</sup>H NMR (500 MHz, CDCl<sub>3</sub>, rt): δ 8.34–8.29 (m, 2H, Ar-H), 8.00–7.94 (m, 2H, Ar-H), 6.58 (d, *J* = 7.4 Hz, 1H, NH), 4.91–4.81 (m, 1H, CH), 3.80 (s, 3H, OCH<sub>3</sub>), 1.84–1.64 (m, 3H, CHCH<sub>2</sub>), 1.00 (dd, *J* = 10.3, 6.3 Hz, 6H, 2CH<sub>3</sub>). <sup>13</sup>C NMR (125 MHz, CDCl<sub>3</sub>, rt): δ 173.53, 165.11, 149.71, 139.37, 128.31, 123.82, 52.63, 51.42, 41.67, 25.03, 22.81, 22.00. IR (KBr, cm<sup>-1</sup>): 3313 (N-H), 1749 (C=O). Calcd for C<sub>14</sub>H<sub>18</sub>N<sub>2</sub>O<sub>5</sub>: C, 57.14; H, 6.16; N, 9.52. Found: C, 56.86; H, 6.11; N, 9.48.

**(+)-*N*-(4-Nitrobenzoyl)-L-leucine methyl ester ((*S*)-7).** The title compound was prepared from L-leucine methyl ester hydrochloride in the same way as (*R*)-**5a** and obtained in 70% yield as a white solid. Mp: 106.6–107.2 °C.  $[\alpha]_D^{25}$  +2.6 (*c* 1.0, CHCl<sub>3</sub>). <sup>1</sup>H NMR (500 MHz, CDCl<sub>3</sub>, rt): δ 8.37–8.24 (m, 2H, Ar-H), 8.03–7.90 (m, 2H, Ar-H), 6.59 (d, *J* = 7.4 Hz, 1H, NH), 4.94–4.80 (m, 1H, CH), 3.80 (s, 3H, OCH<sub>3</sub>), 1.87–1.62 (m, 3H, CHCH<sub>2</sub>), 1.00 (dd, *J* = 10.3, 6.3 Hz, 6H, 2CH<sub>3</sub>). <sup>13</sup>C NMR (125 MHz, CDCl<sub>3</sub>, rt): δ 173.51, 165.10,

149.72, 139.39, 128.31, 123.83, 52.64, 51.41, 41.70, 25.03, 22.81, 22.00. IR (KBr,  $\text{cm}^{-1}$ ): 3313 (N-H), 1747 (C=O). Calcd for  $\text{C}_{14}\text{H}_{18}\text{N}_2\text{O}_5$ : C, 57.14; H, 6.16; N, 9.52. Found: C, 57.06; H, 6.16; N, 9.47.

**(R)-(+)-1,1'-Binaphthyl-2,2'-diyl bis(4-nitrobenzoate) ((R)-8a).** (*R*)-1,1'-Bi-2-naphthol (1.00 g, 3.49 mmol), 4-nitrobenzoic acid (1.75 g, 10.5 mmol), DMAP (1.28 g, 10.5 mmol) were dissolved in anhydrous dichloromethane (18 mL) and the solution was cooled to 0 °C. To this solution was added EDC-HCl (2.01 g, 10.5 mmol) and the mixture was stirred at rt for 12 h. The mixture was diluted with dichloromethane, washed with 1 N HCl aqueous solution and water, and then dried over  $\text{Na}_2\text{SO}_4$ . The solvent was removed under reduced pressure and the crude product was purified by silica gel chromatography using hexane–dichloromethane (1/4, v/v) as the eluent to give the desired product as a pale yellow solid (2.00 g, 98% yield). Mp: 93.6–94.1 °C.  $[\alpha]_D^{25} +4.9$  (*c* 1.0,  $\text{CHCl}_3$ ).  $^1\text{H}$  NMR (500 MHz,  $\text{CDCl}_3$ , rt):  $\delta$  8.11–8.04 (m, 4H, Ar-H), 8.02 (d, *J* = 8.6 Hz, 2H, Ar-H), 7.95 (d, *J* = 8.6 Hz, 2H, Ar-H), 7.72–7.65 (m, 4H, Ar-H), 7.59–7.48 (m, 4H, Ar-H), 7.46–7.34 (m, 4H, Ar-H).  $^{13}\text{C}$  NMR (125 MHz,  $\text{CDCl}_3$ , rt):  $\delta$  162.90, 150.54, 146.46, 134.41, 133.12, 131.68, 130.79, 130.04, 128.24, 127.30, 126.23, 125.87, 123.39, 121.24. IR (KBr,  $\text{cm}^{-1}$ ): 1743 (C=O). Calcd for  $\text{C}_{34}\text{H}_{20}\text{N}_2\text{O}_8 \cdot 0.01\text{H}_2\text{O}$ : C, 69.84; H, 3.45; N, 4.79. Found: C, 69.54; H, 3.48; N, 4.75.

**(S)-(–)-1,1'-Binaphthyl-2,2'-diyl bis(4-nitrobenzoate) ((S)-8a).** The title compound was prepared from (*S*)-1,1'-bi-2-naphthol in the same way as (*R*)-8a and obtained in 99% yield as a pale yellow solid. Mp: 93.5–93.9 °C.  $[\alpha]_D^{25} -4.7$  (*c* 1.0,  $\text{CHCl}_3$ ).  $^1\text{H}$  NMR (500 MHz,  $\text{CDCl}_3$ , rt):  $\delta$  8.11–8.04 (m, 4H, Ar-H), 8.02 (d, *J* = 9.2 Hz, 2H, Ar-H), 7.95 (d, *J* = 8.0 Hz, 2H, Ar-H), 7.73–7.65 (m, 4H, Ar-H), 7.58–7.47 (m, 4H, Ar-H), 7.44–7.36 (m, 4H, Ar-H).  $^{13}\text{C}$  NMR (125 MHz,  $\text{CDCl}_3$ , rt):  $\delta$  162.91, 150.55, 146.46, 134.41, 133.11, 131.68, 130.79, 130.04, 128.24, 127.29, 126.23, 125.87, 123.40, 121.24. IR (KBr,  $\text{cm}^{-1}$ ): 1744 (C=O). Calcd for  $\text{C}_{34}\text{H}_{20}\text{N}_2\text{O}_8$ : C, 69.86; H, 3.45; N, 4.79. Found: C, 69.79; H, 3.58; N, 4.78.

***rac*-1,1'-Binaphthyl-2,2'-diyl bis(4-nitrobenzoate) (*rac*-8a).** The title compound was prepared from *rac*-1,1'-bi-2-naphthol in the same way as (*R*)-8a and obtained in 98% yield as a pale yellow solid. Mp: 173.5–173.8 °C.  $^1\text{H}$  NMR (500 MHz,  $\text{CDCl}_3$ , rt):  $\delta$  8.09–8.04 (m, 4H, Ar-H), 8.02 (d, *J* = 9.2 Hz, 2H, Ar-H), 7.95 (d, *J* = 8.0 Hz, 2H, Ar-H), 7.71–7.66 (m, 4H, Ar-H), 7.57–7.49 (m, 4H, Ar-H), 7.44–7.37 (m, 4H).  $^{13}\text{C}$  NMR (125 MHz,  $\text{CDCl}_3$ , rt):  $\delta$

162.91, 150.55, 146.46, 134.41, 133.11, 131.68, 130.79, 130.04, 128.24, 127.29, 126.23, 125.87, 123.40, 121.24. IR (KBr,  $\text{cm}^{-1}$ ): 1741 (C=O). Calcd for  $\text{C}_{34}\text{H}_{20}\text{N}_2\text{O}_8$ : C, 69.86; H, 3.45; N, 4.79. Found: C, 69.75; H, 3.58; N, 4.81.

***rac*-1,1'-Binaphthyl-2,2'-diyl bisbenzoate (*rac*-8b).** The title compound was prepared from *rac*-1,1'-bi-2-naphthol and benzoic acid in the same way as (*R*)-8a and obtained in 90% yield as a pale yellow solid. Mp: 164.5–164.7 °C.  $^1\text{H}$  NMR (500 MHz,  $\text{CDCl}_3$ , rt):  $\delta$  7.98 (d,  $J = 8.6$  Hz, 2H, Ar-H), 7.90 (d,  $J = 8.6$  Hz, 2H, Ar-H), 7.64 (d,  $J = 7.4$  Hz, 4H, Ar-H), 7.56 (d,  $J = 8.6$  Hz, 2H, Ar-H), 7.44 (dd,  $J = 12.6, 7.4$  Hz, 4H, Ar-H), 7.39 (d,  $J = 8.6$  Hz, 2H, Ar-H), 7.36–7.30 (m, 2H, Ar-H), 7.28–7.20 (m, 4H, Ar-H).  $^{13}\text{C}$  NMR (125 MHz,  $\text{CDCl}_3$ , 55 °C):  $\delta$  164.67, 147.19, 133.55, 133.05, 131.67, 129.87, 129.49, 128.17, 128.01, 126.81, 126.22, 125.67, 123.80, 121.81. IR (KBr,  $\text{cm}^{-1}$ ): 1736 (C=O). Calcd for  $\text{C}_{34}\text{H}_{22}\text{O}_4$ : C, 82.58; H, 4.48. Found: C, 82.29; H, 4.51.

**(*R*)-(-)-5,5',6,6',7,7',8,8'-Octahydro-1,1'-binaphthyl-2,2'-diyl bis(4-nitrobenzoate) ((*R*)-9).** The title compound was prepared from (*R*)-5,5',6,6',7,7',8,8'-octahydro-1,1'-bi-2-naphthol in the same way as (*R*)-8a and obtained in 83% yield as a pale yellow solid. Mp: 81.4–81.8 °C.  $[\alpha]_{\text{D}}^{25} -7.4$  ( $c$  1.0,  $\text{CHCl}_3$ ).  $^1\text{H}$  NMR (500 MHz,  $\text{CDCl}_3$ , rt):  $\delta$  8.20 (d,  $J = 8.6$  Hz, 4H, Ar-H), 7.90 (d,  $J = 8.6$  Hz, 4H, Ar-H), 7.10 (q,  $J = 8.6$  Hz, 4H, Ar-H), 2.90–2.68 (m, 4H, 2 $\text{CH}_2$ ), 2.52–2.21 (m, 4H, 2 $\text{CH}_2$ ), 1.86–1.61 (m, 8H, 4 $\text{CH}_2$ ).  $^{13}\text{C}$  NMR (125 MHz,  $\text{CDCl}_3$ , 55 °C):  $\delta$  162.96, 150.84, 145.94, 137.51, 135.81, 135.23, 130.87, 129.49, 128.16, 123.41, 119.35, 29.53, 27.29, 22.92, 22.89. IR (KBr,  $\text{cm}^{-1}$ ): 1742 (C=O). Calcd for  $\text{C}_{34}\text{H}_{28}\text{N}_2\text{O}_8$ : C, 68.91; H, 4.76; N, 4.73. Found: C, 68.92; H, 4.71; N, 4.69.

**(*S*)-(+)-5,5',6,6',7,7',8,8'-Octahydro-1,1'-binaphthyl-2,2'-diyl bis(4-nitrobenzoate) ((*S*)-9).** The title compound was prepared from (*S*)-5,5',6,6',7,7',8,8'-octahydro-1,1'-bi-2-naphthol in the same way as (*R*)-8a and obtained in 91% yield as a pale yellow solid. Mp: 81.7–82.2 °C.  $[\alpha]_{\text{D}}^{25} +7.6$  ( $c$  1.0,  $\text{CHCl}_3$ ).  $^1\text{H}$  NMR (500 MHz,  $\text{CDCl}_3$ , rt):  $\delta$  8.19 (d,  $J = 9.2$  Hz, 4H, Ar-H), 7.90 (d,  $J = 8.6$  Hz, 4H, Ar-H), 7.10 (q,  $J = 8.6$  Hz, 4H, Ar-H), 2.90–2.66 (m, 4H, 2 $\text{CH}_2$ ), 2.54–2.22 (m, 2H, 2 $\text{CH}_2$ ), 1.87–1.59 (m, 8H, 4 $\text{CH}_2$ ).  $^{13}\text{C}$  NMR (125 MHz,  $\text{CDCl}_3$ , 55 °C):  $\delta$  162.96, 150.84, 145.94, 137.51, 135.81, 135.23, 130.87, 129.49, 128.15, 123.42, 119.35, 29.54, 27.29, 22.92, 22.89. IR (KBr,  $\text{cm}^{-1}$ ): 1741 (C=O). Calcd for  $\text{C}_{34}\text{H}_{28}\text{N}_2\text{O}_8$ : C, 68.91; H, 4.76; N, 4.73. Found: C, 68.91; H, 4.80; N, 4.65.

## Supporting data

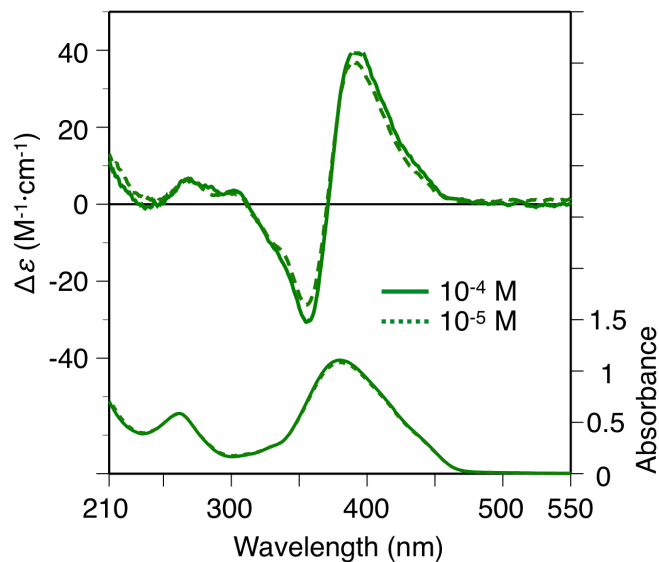

**Fig. S1** CD and absorption spectra of Ce-**1b** in hexane/THF (75/25, v/v) at 25 °C. The spectra indicated by dashed and solid lines were obtained from polymer solutions of  $1.0 \times 10^{-5}$  M (cell length: 10 mm) and  $1.0 \times 10^{-4}$  M (cell length: 1.0 mm), respectively.

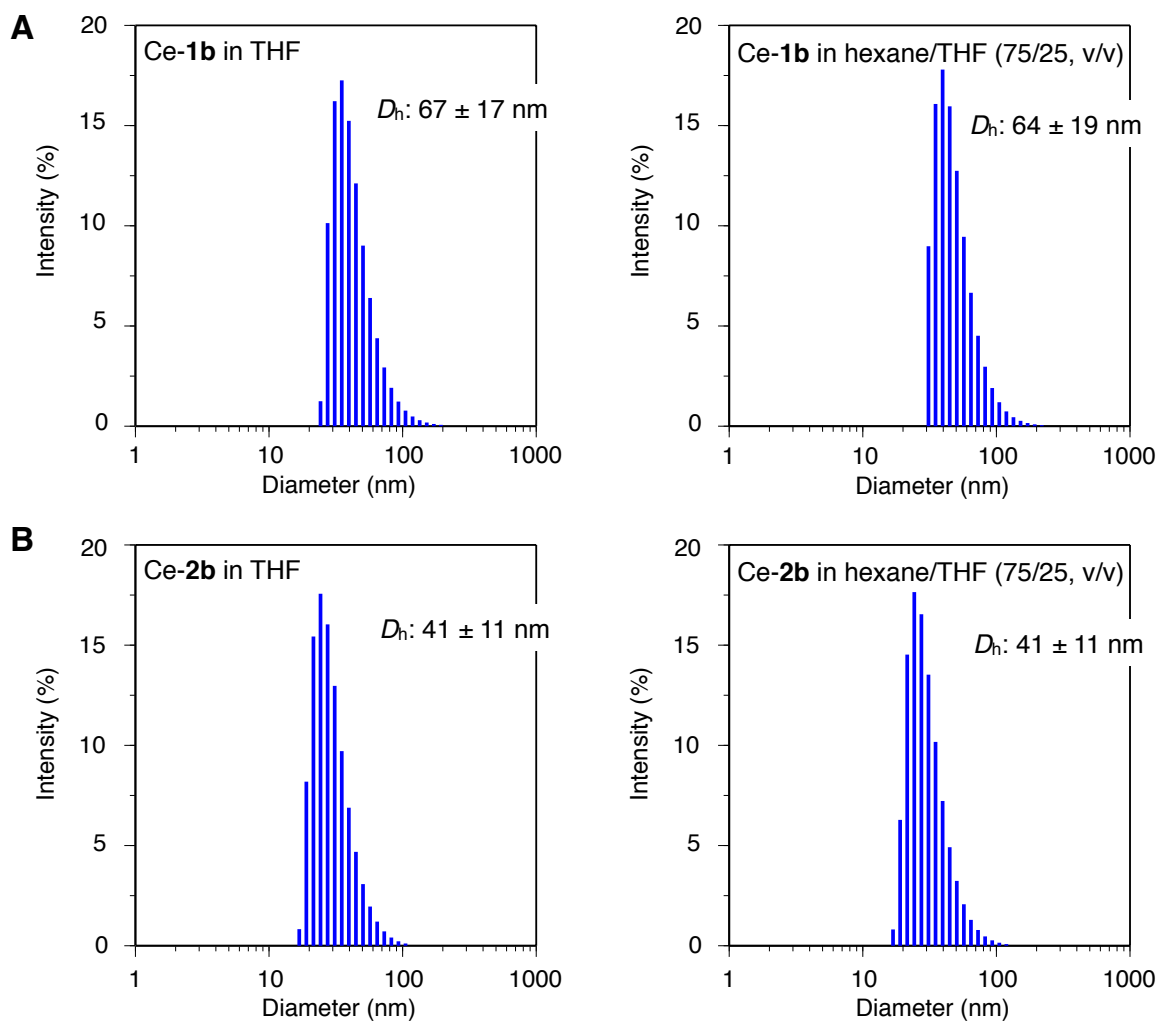

**Fig. S2** Histogram analysis of the DLS measurements of Ce-1b (A) and Ce-2b (B) in THF (left) and hexane/THF (75/25, v/v) (right) at 30 °C after filtration through a membrane filter with a pore size of 0.45  $\mu\text{m}$ . [glucose unit] =  $1.0 \times 10^{-4}$  M.

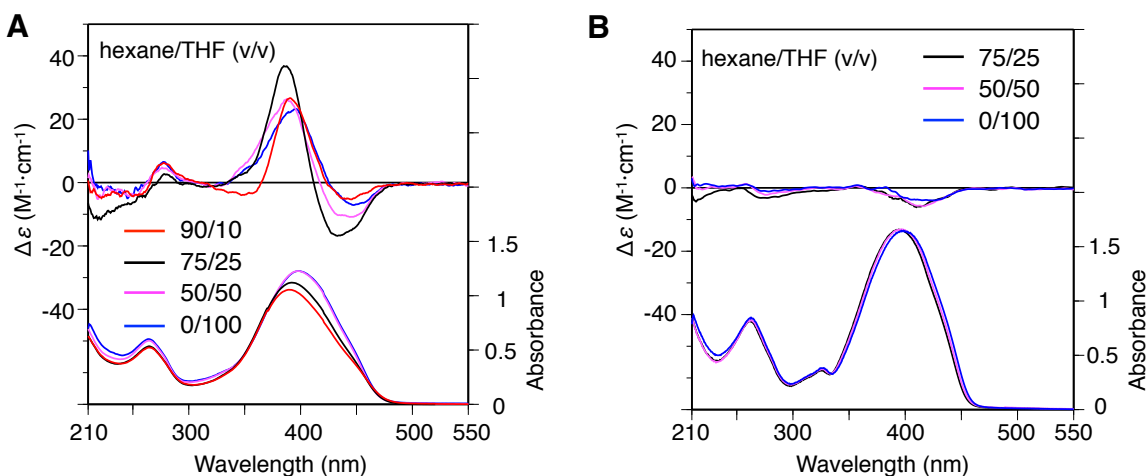

**Fig. S3** CD and absorption spectra of Ce-**2b** (A) and Gl-**1b** (B) in hexane/THF (hexane: 0–90 vol %) at 25 °C. [glucose unit] =  $1.0 \times 10^{-5}$  M.

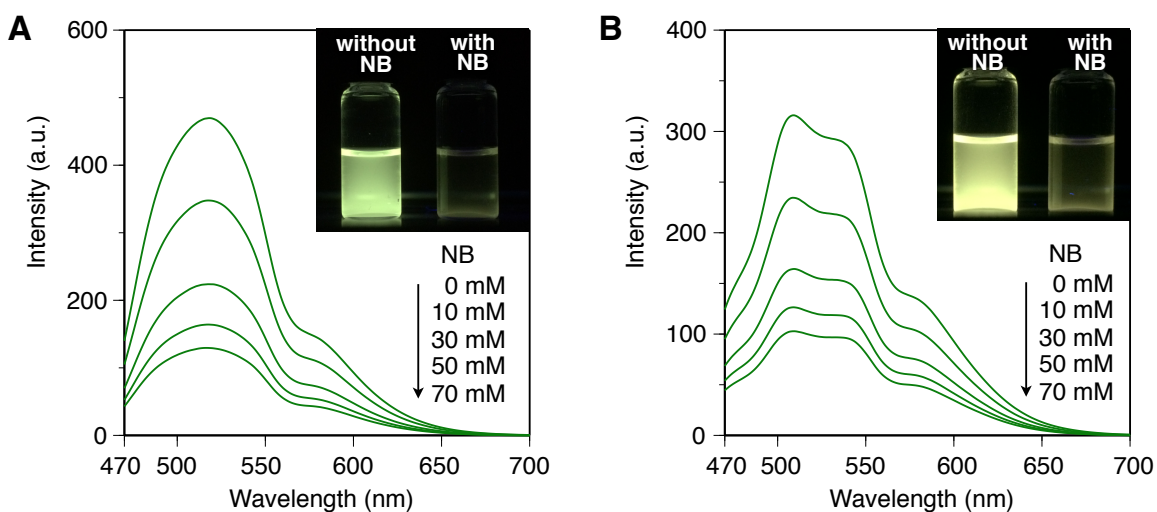

**Fig. S4** Fluorescence spectra of Ce-**2b** (A) and Gl-**1b** (B) upon the addition of various amounts of NB (0–70 mM) in THF at rt. [glucose unit] =  $1.0 \times 10^{-5}$  M,  $\lambda_{\text{ex}}$  = 450 nm. Insets: Photographs of each fluorophore solution in the absence (left) and presence (right) of nitrobenzene (70 mM) under irradiation at 365 nm.



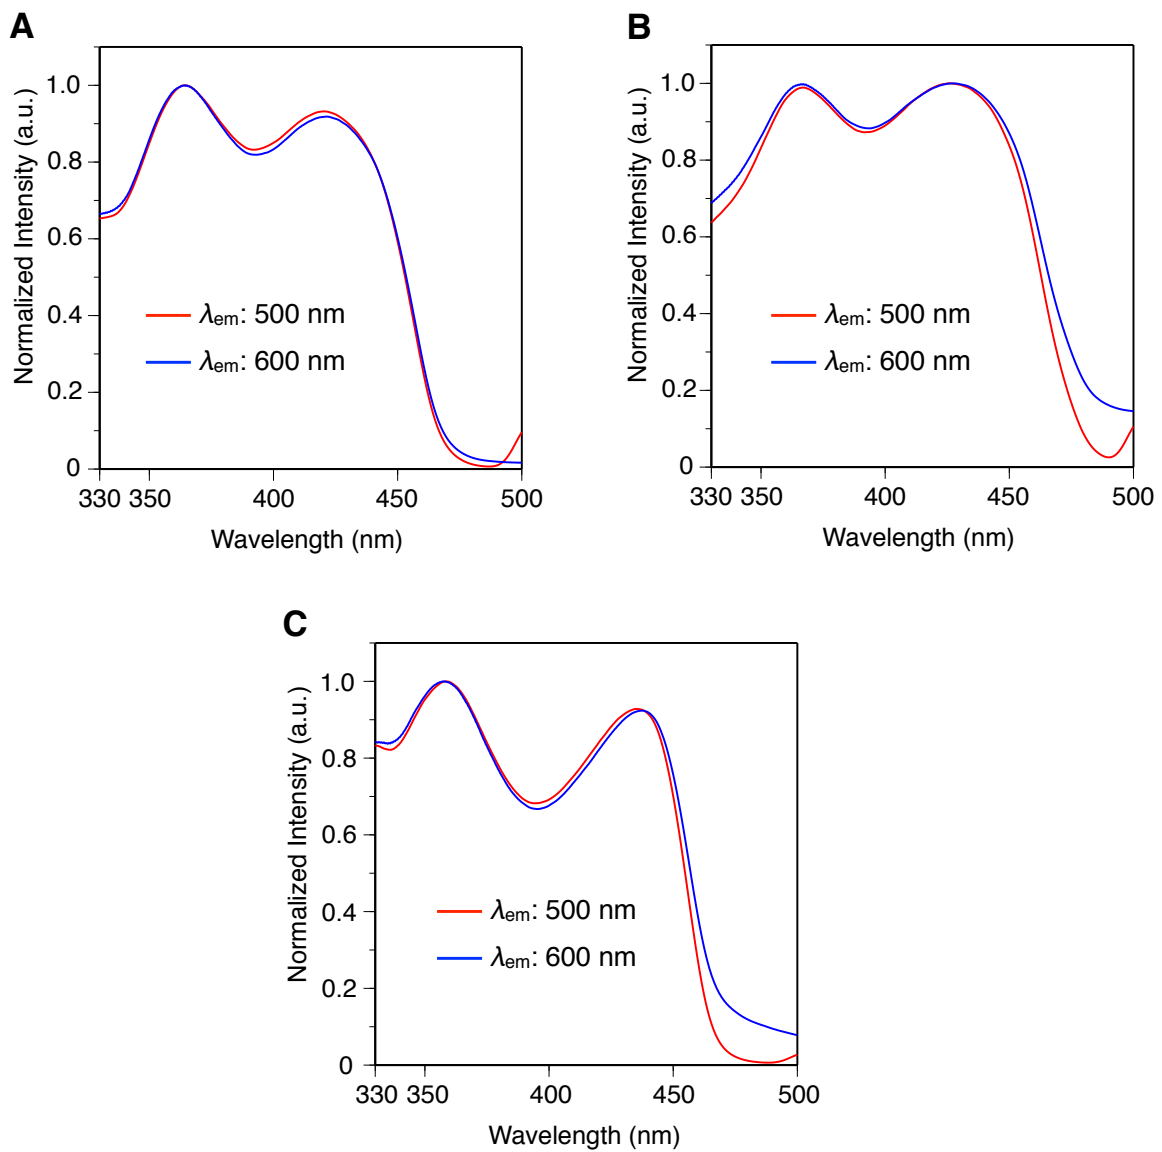

**Fig. S5** Excitation spectra of Ce-1b (A), Ce-2b (B) and Gl-1b (C) recorded for 500 (red line) and 600 (blue line) nm emissions in THF at rt. [glucose unit] =  $1.0 \times 10^{-5}$  M.

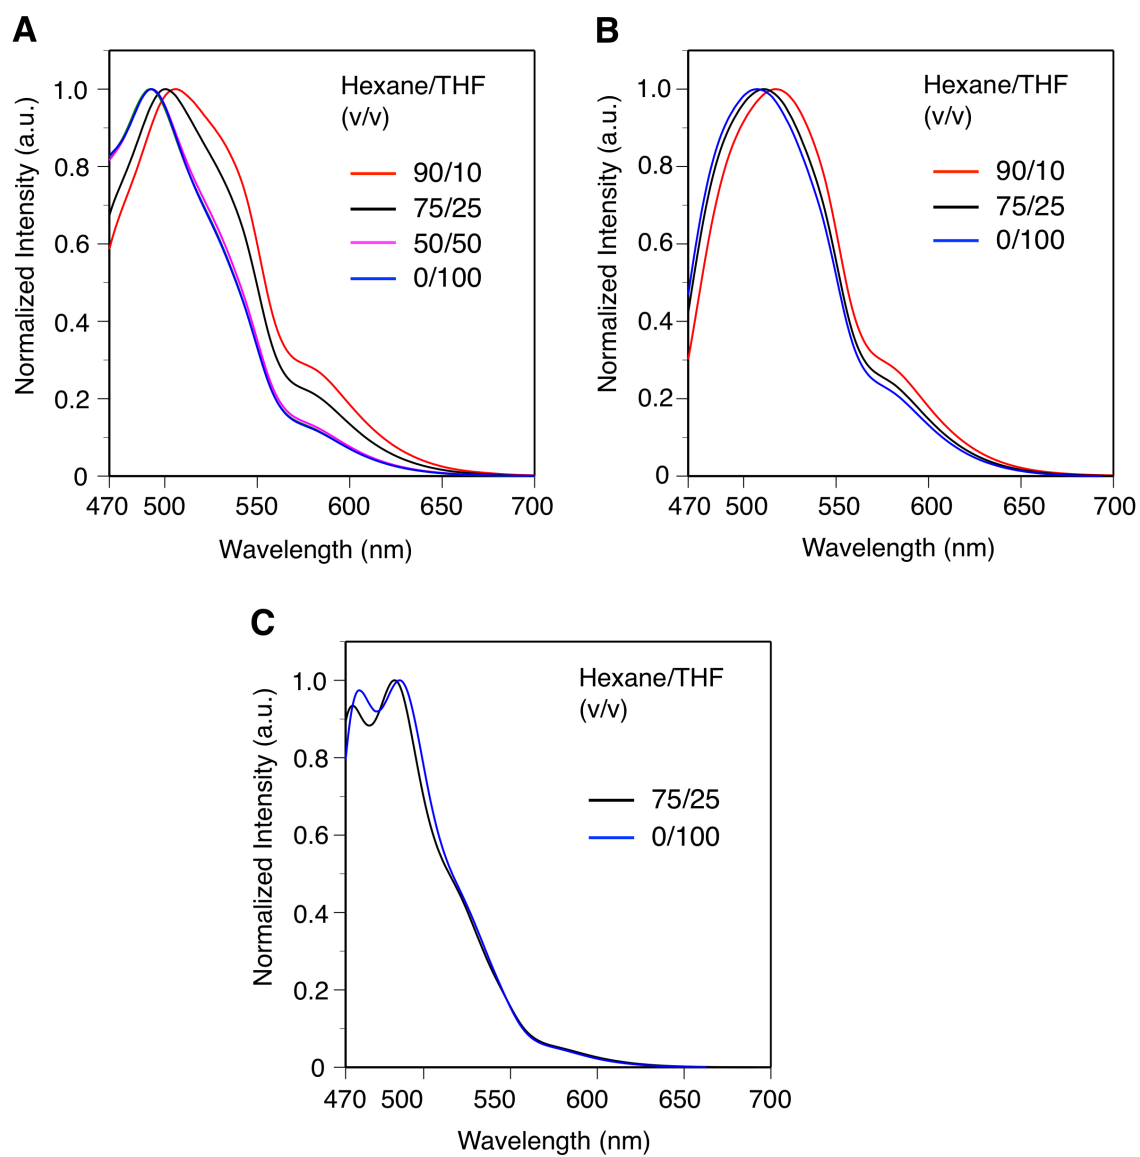

**Fig. S6** Fluorescence spectra of Ce-1b (A), Ce-2b (B) and Gl-1b (C) in hexane/THF (hexane: 0–90 vol %) at rt. [glucose unit] =  $1.0 \times 10^{-5}$  M,  $\lambda_{\text{ex}} = 450$  nm.

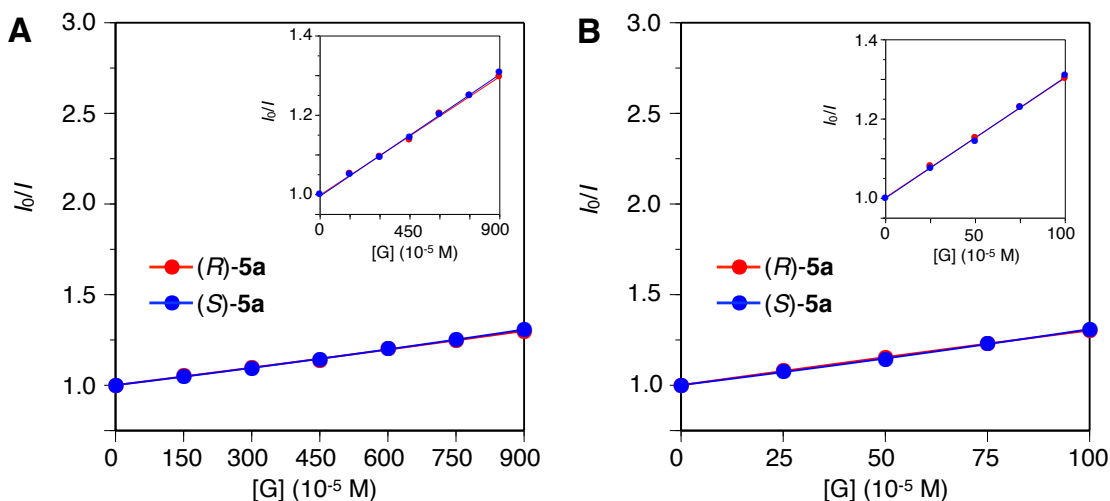

**Fig. S7** Stern-Volmer plots for the fluorescence quenching of Gl-1b (A) and Ce-2b (B) by (R)-5a (red) and (S)-5a (blue) in hexane/THF (75/25 for Gl-1b and 90/10 for Ce-2b, v/v) at rt. [glucose unit] =  $1.0 \times 10^{-5}$  M,  $\lambda_{\text{ex}} = 450$  nm. The insets show expanded detail of the Stern-Volmer plots.

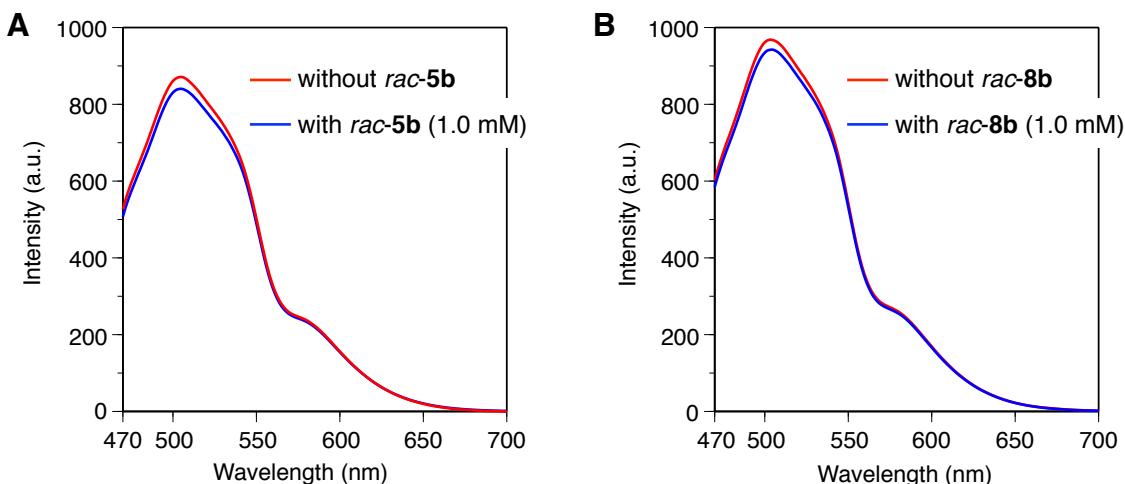

**Fig. S8** Fluorescence spectra of Ce-1b ( $\lambda_{\text{ex}} = 450$  nm) in the absence (red line) and presence (blue line) of rac-5b (A) and rac-8b (B) in hexane/THF (90/10, v/v) at rt. [glucose unit] =  $1.0 \times 10^{-5}$  M.

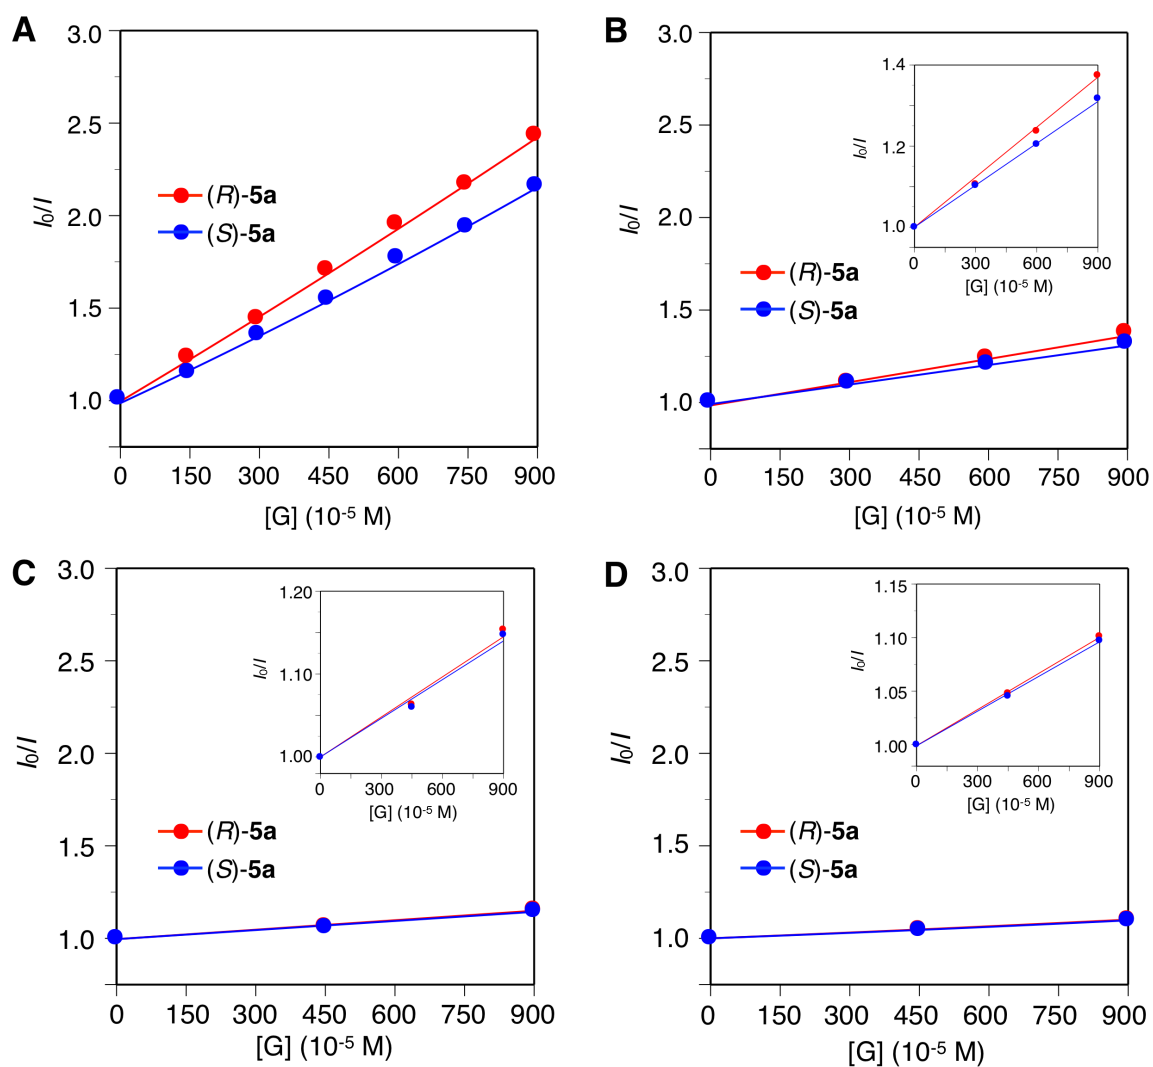

**Fig. S9** Stern-Volmer plots for the fluorescence quenching of **Ce-1b** ( $\lambda_{\text{ex}} = 450$  nm) by (*R*)-**5a** (red) and (*S*)-**5a** (blue) in hexane/THF (hexane: 75 (A), 50 (B), 25 (C) and 0 (D) vol %) at rt. [glucose unit] =  $1.0 \times 10^{-5}$  M. The insets in B–D show expanded detail of the Stern-Volmer plots.

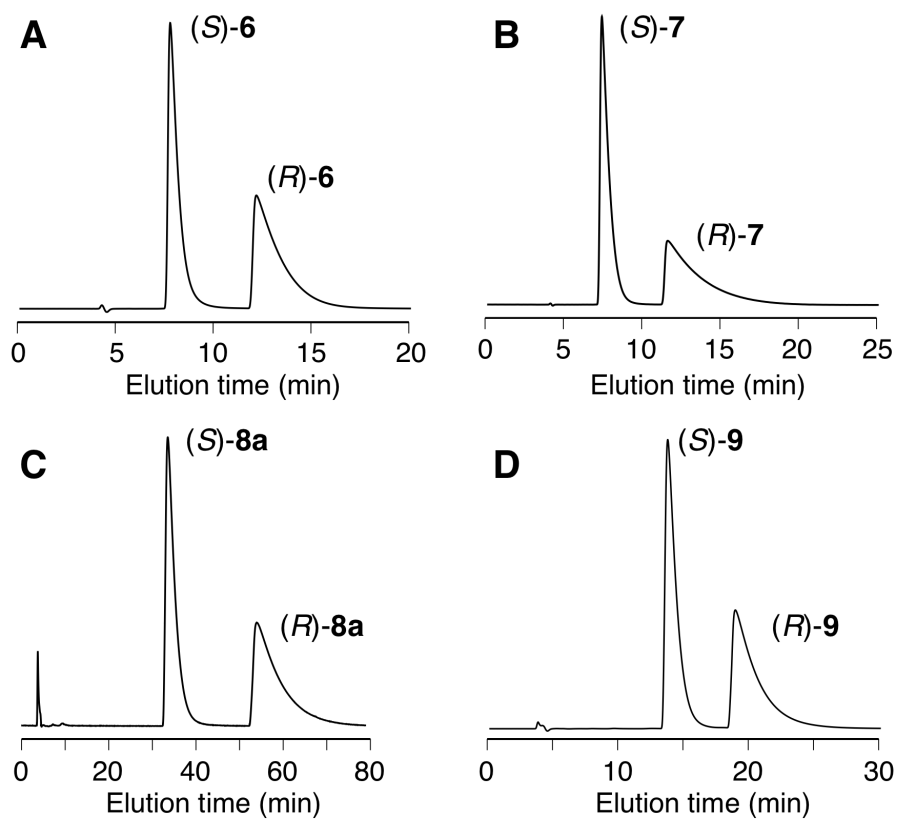

**Fig. S10** Chromatograms for the resolutions of **6** (A), **7** (B), **8a** (C) and **9** (D) on Ce-**1b**-based CSP (column, 25 cm  $\times$  0.20 cm (i.d.); eluent, hexane/2-propanol (90/10, v/v); flow rate, 0.2 mL/min).

**Table S1 Resolutions of racemates on CTPC-based CSP**

| Racemate  | 90/10 <sup>b</sup>   |          | 70/30 <sup>c</sup>   |          | 50/50 <sup>d</sup>   |          |
|-----------|----------------------|----------|----------------------|----------|----------------------|----------|
|           | $k_1$                | $\alpha$ | $k_1$                | $\alpha$ | $k_1$                | $\alpha$ |
| <b>5a</b> | 14.9<br>( <i>S</i> ) | 1.11     | 2.62<br>( <i>S</i> ) | 1.06     | 1.28                 | 1.0      |
| <b>6</b>  | 7.12<br>( <i>R</i> ) | 1.22     | 1.38<br>( <i>R</i> ) | 1.23     | 0.69<br>( <i>R</i> ) | 1.25     |
| <b>7</b>  | 8.37<br>( <i>S</i> ) | 1.06     | 1.99                 | 1.0      | 1.08                 | 1.0      |
| <b>8a</b> | 19.2<br>( <i>R</i> ) | 1.50     | 10.4<br>( <i>R</i> ) | 1.42     | 7.15<br>( <i>R</i> ) | 1.38     |
| <b>9</b>  | 4.02<br>( <i>S</i> ) | 1.51     | 2.00<br>( <i>S</i> ) | 1.48     | 1.76<br>( <i>S</i> ) | 1.48     |

Column: 25 cm × 0.20 cm (i.d.). <sup>a</sup>Eluent: H = hexane; I = 2-propanol. Flow rate: <sup>b</sup>0.2 mL min<sup>-1</sup>; <sup>c</sup>0.1 mL min<sup>-1</sup>; <sup>d</sup>0.05 mL min<sup>-1</sup>. The characters in parentheses represent the absolute configuration of the first-eluted enantiomer.

# NMR spectral data

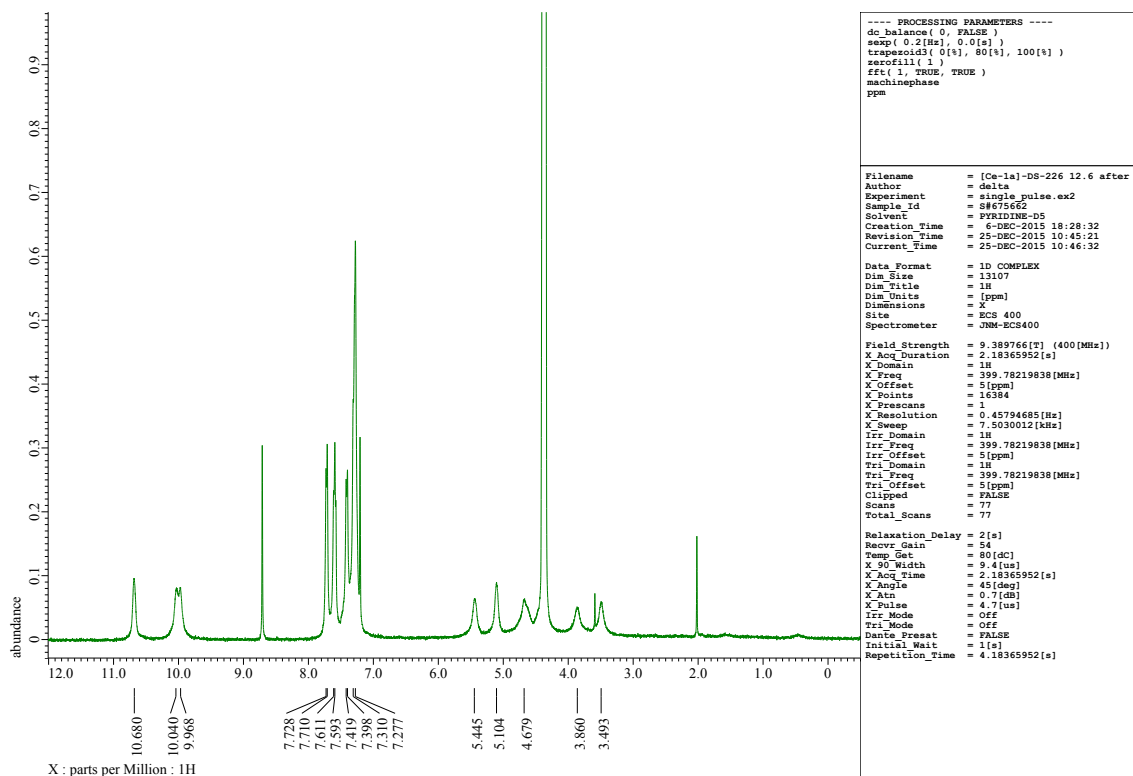

**Fig. S11**  $^1\text{H}$  NMR (pyridine- $d_5$ , 400 MHz) spectrum of Ce-1a.

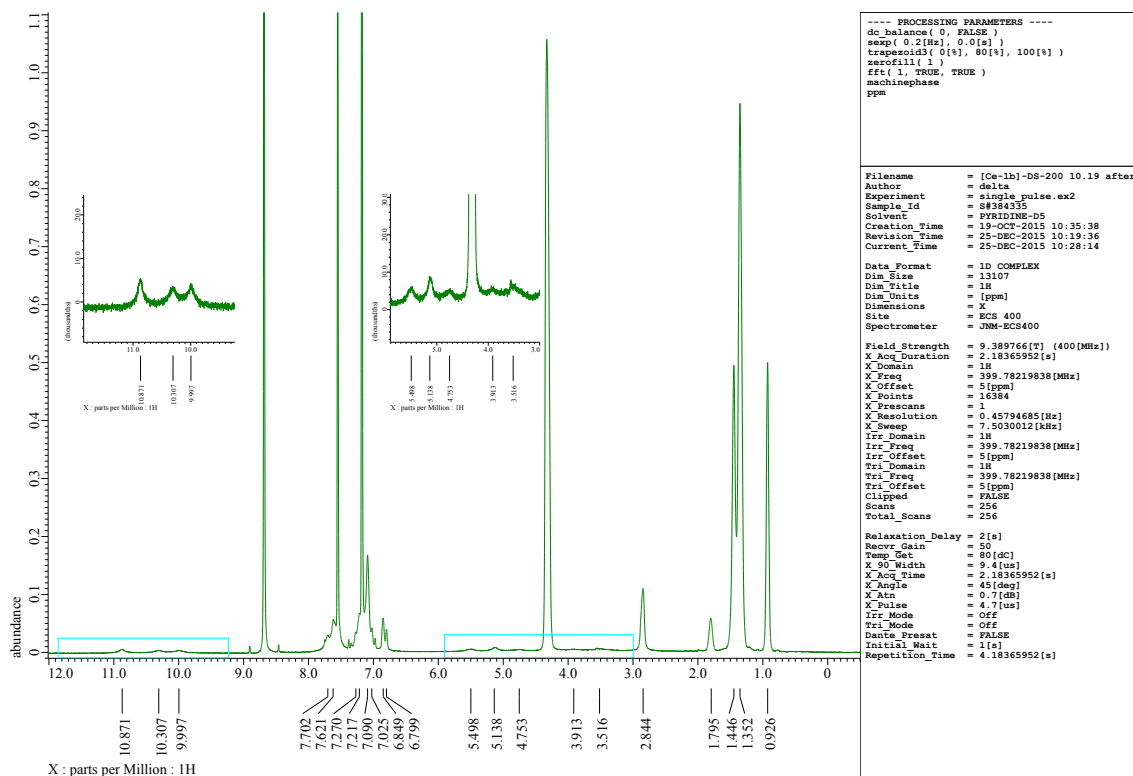

**Fig. S12**  $^1\text{H}$  NMR (pyridine- $d_5$ , 400 MHz) spectrum of Ce-1b.

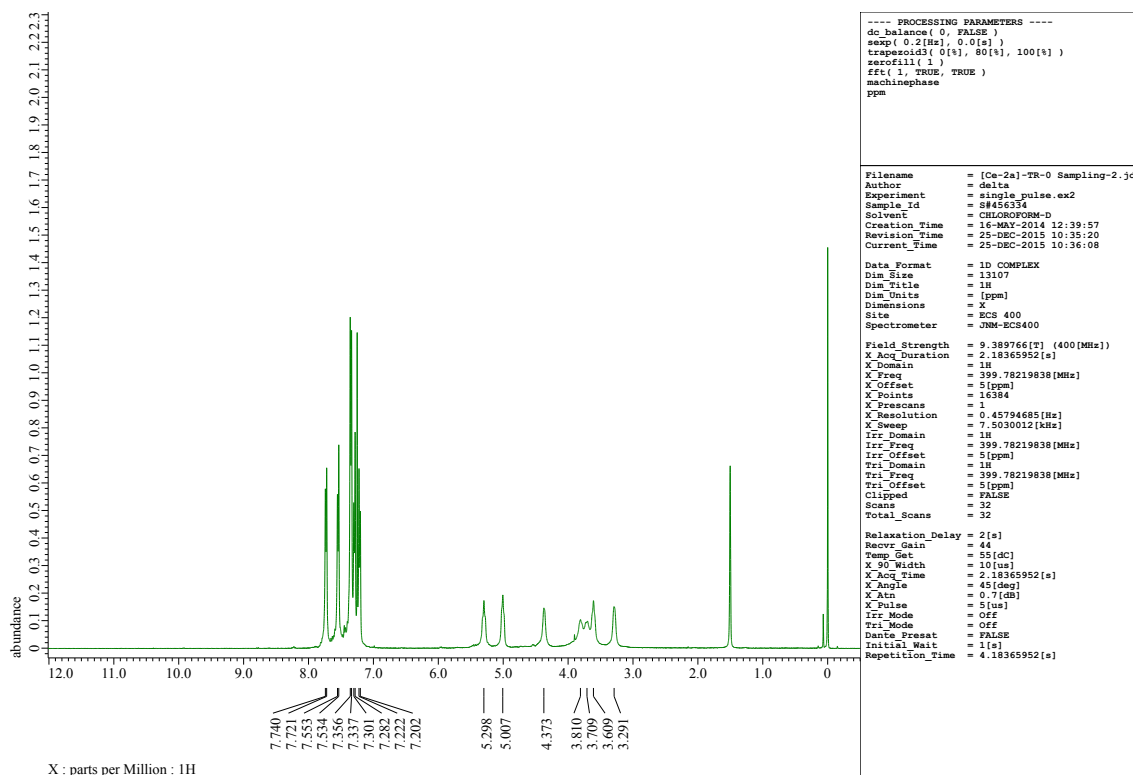

Fig. S13  $^1\text{H}$  NMR ( $\text{CDCl}_3$ , 400 MHz) spectrum of Ce-2a.

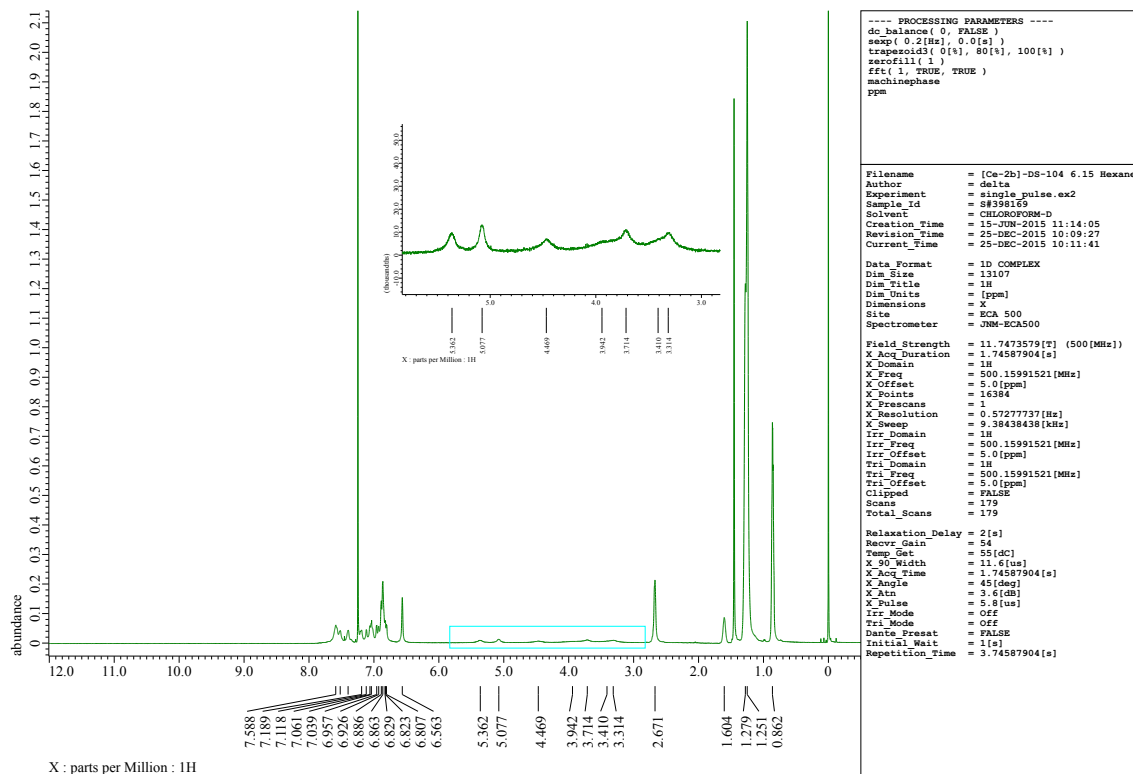

Fig. S14  $^1\text{H}$  NMR ( $\text{CDCl}_3$ , 500 MHz) spectrum of Ce-2b.



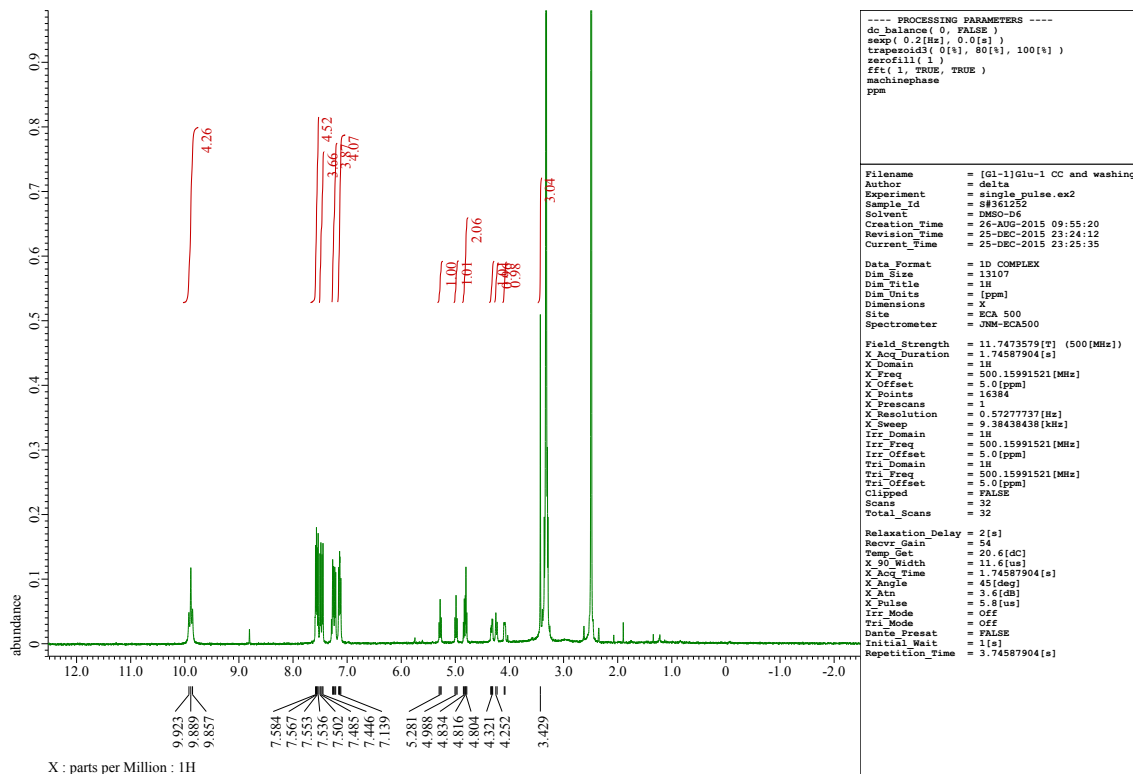

Fig. S15 <sup>1</sup>H NMR (DMSO-*d*<sub>6</sub>, 500 MHz) spectrum of Gl-1a.

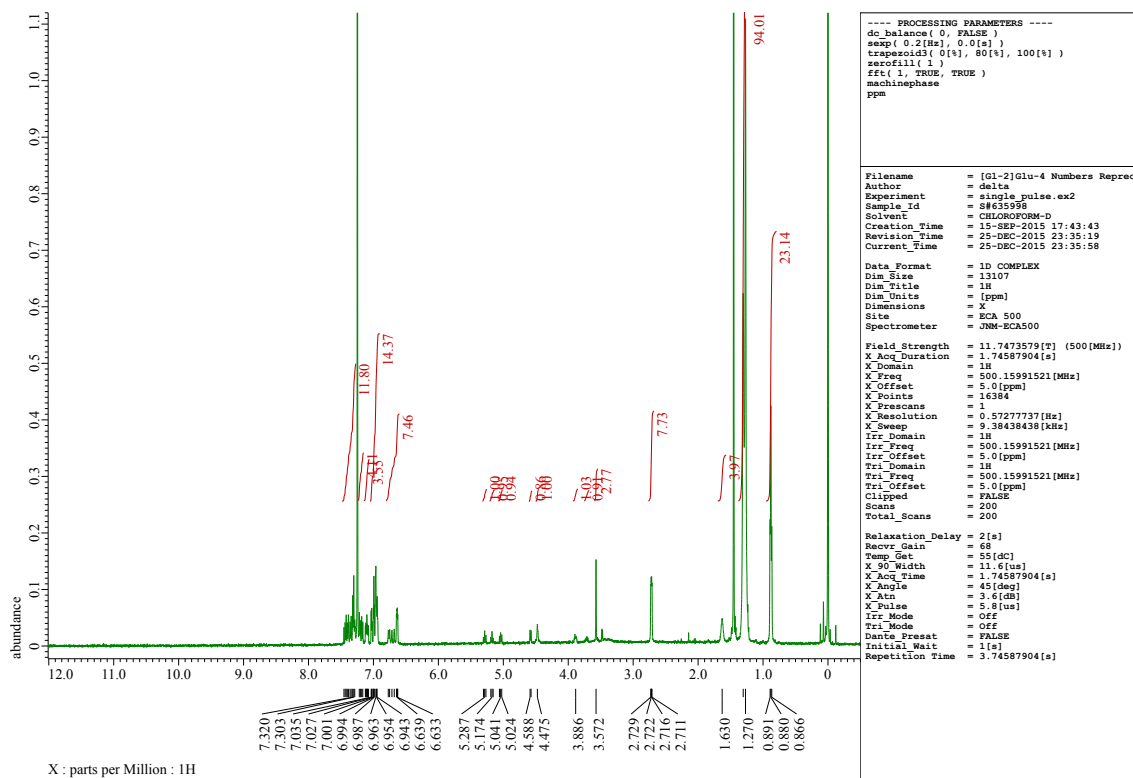

Fig. S16 <sup>1</sup>H NMR (CDCl<sub>3</sub>, 500 MHz) spectrum of Gl-1b.

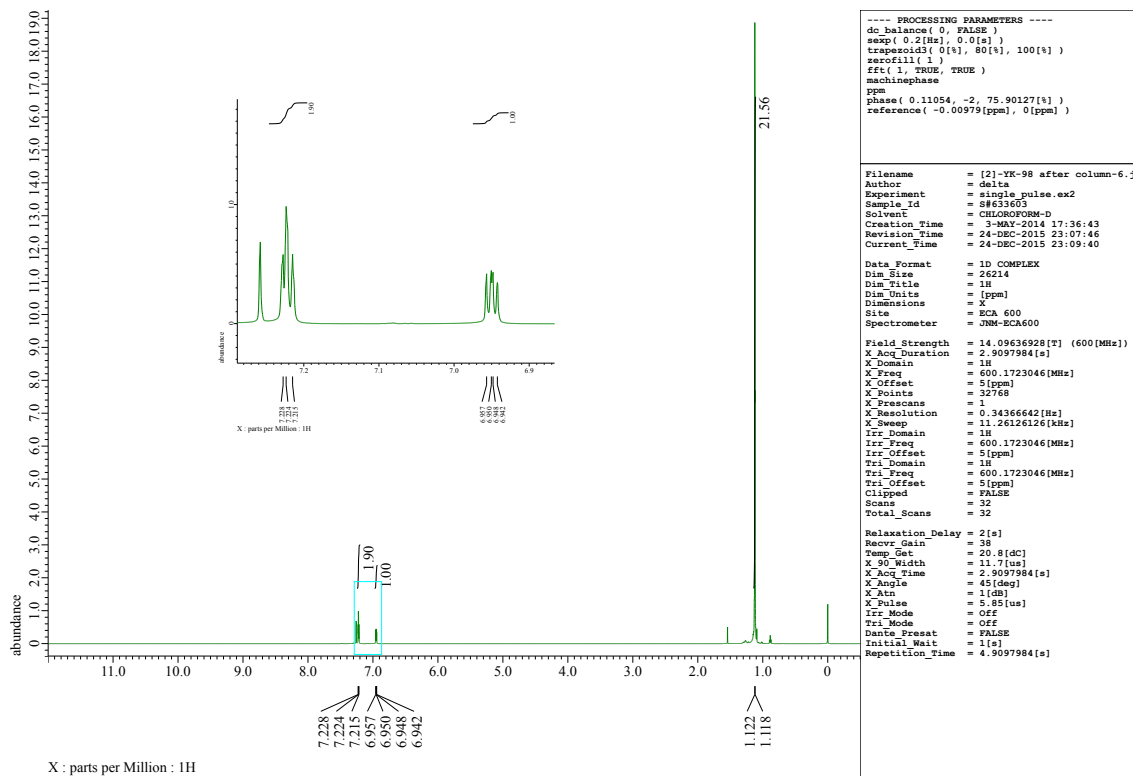

Fig. S17  $^1\text{H}$  NMR ( $\text{CDCl}_3$ , 600 MHz) spectrum of **3b**.

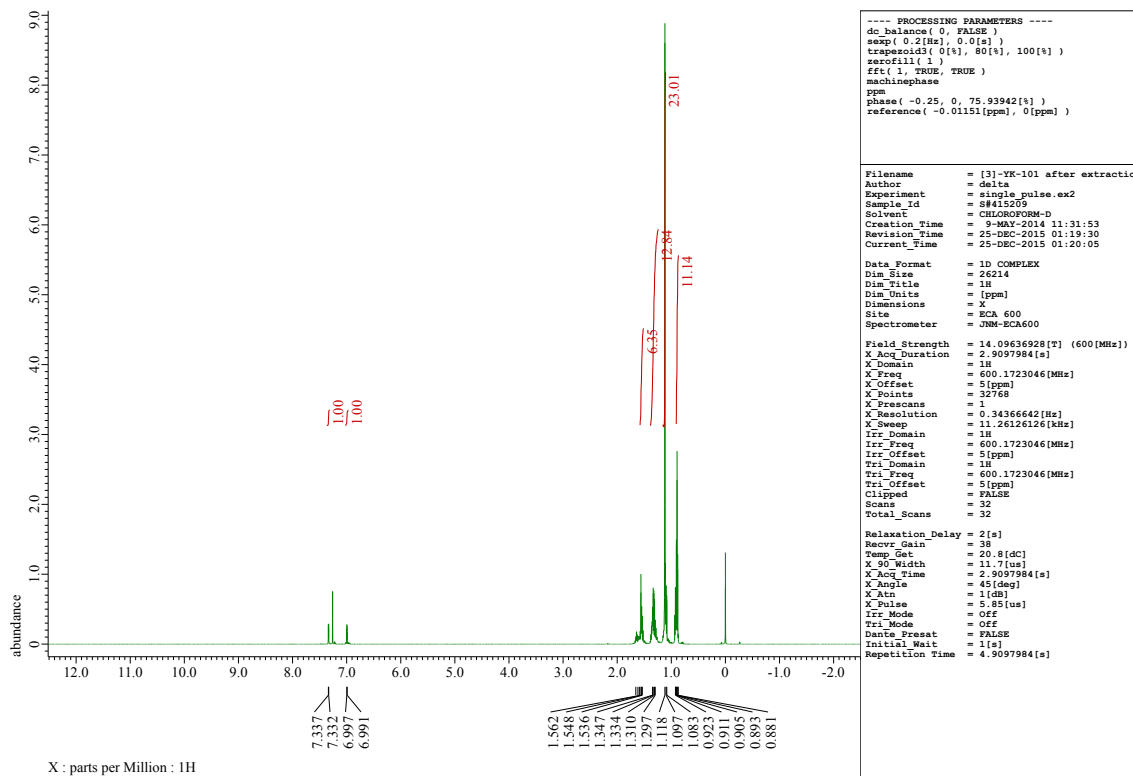

Fig. S18  $^1\text{H}$  NMR ( $\text{CDCl}_3$ , 600 MHz) spectrum of **3c**.

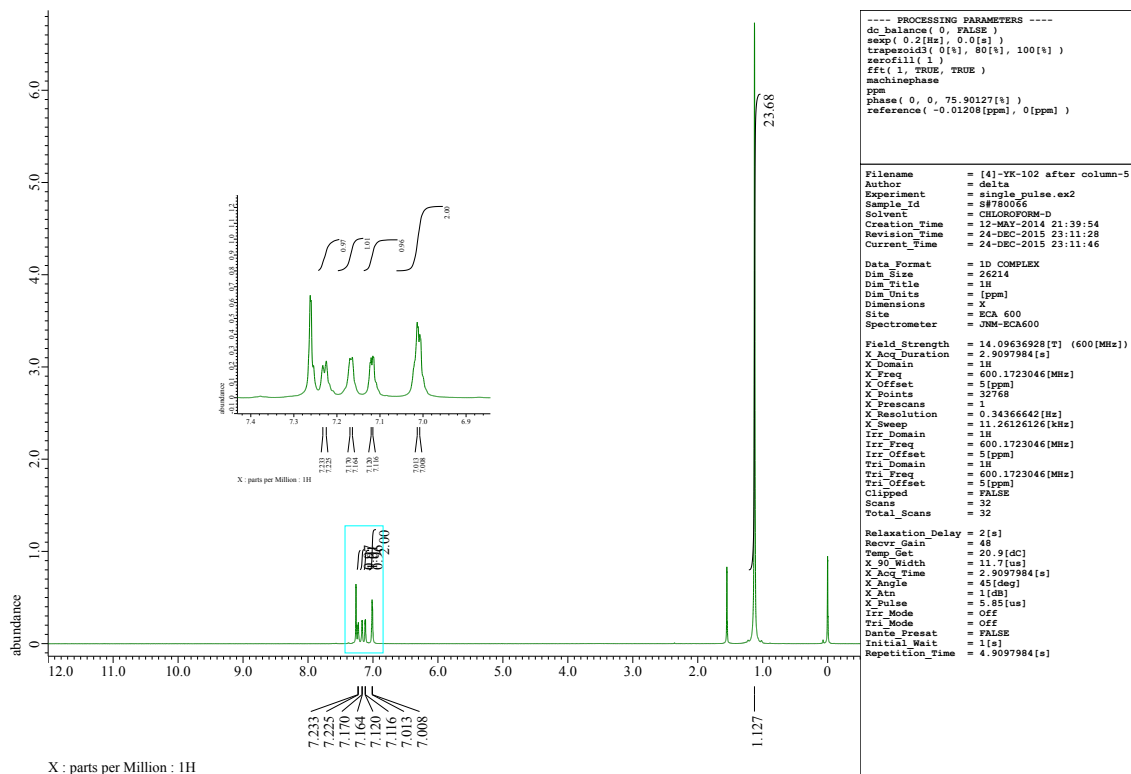

Fig. S19  $^1\text{H}$  NMR ( $\text{CDCl}_3$ , 600 MHz) spectrum of **3d**.

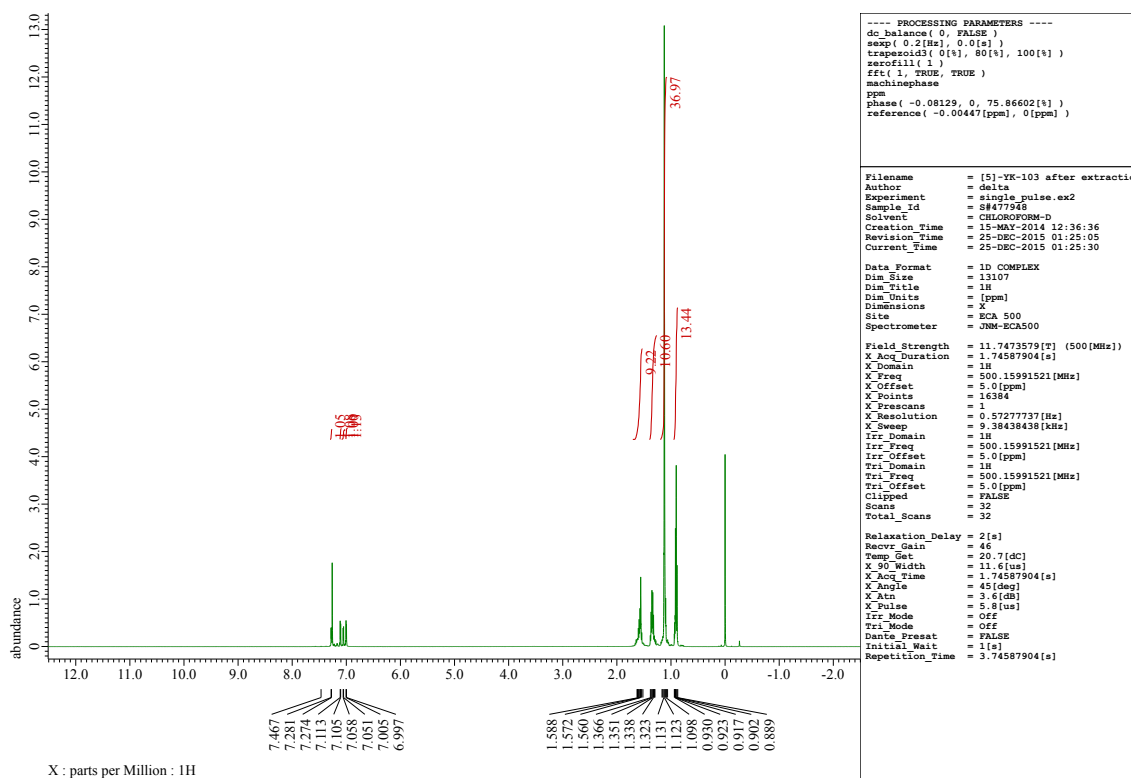

Fig. S20  $^1\text{H}$  NMR ( $\text{CDCl}_3$ , 500 MHz) spectrum of **3e**.

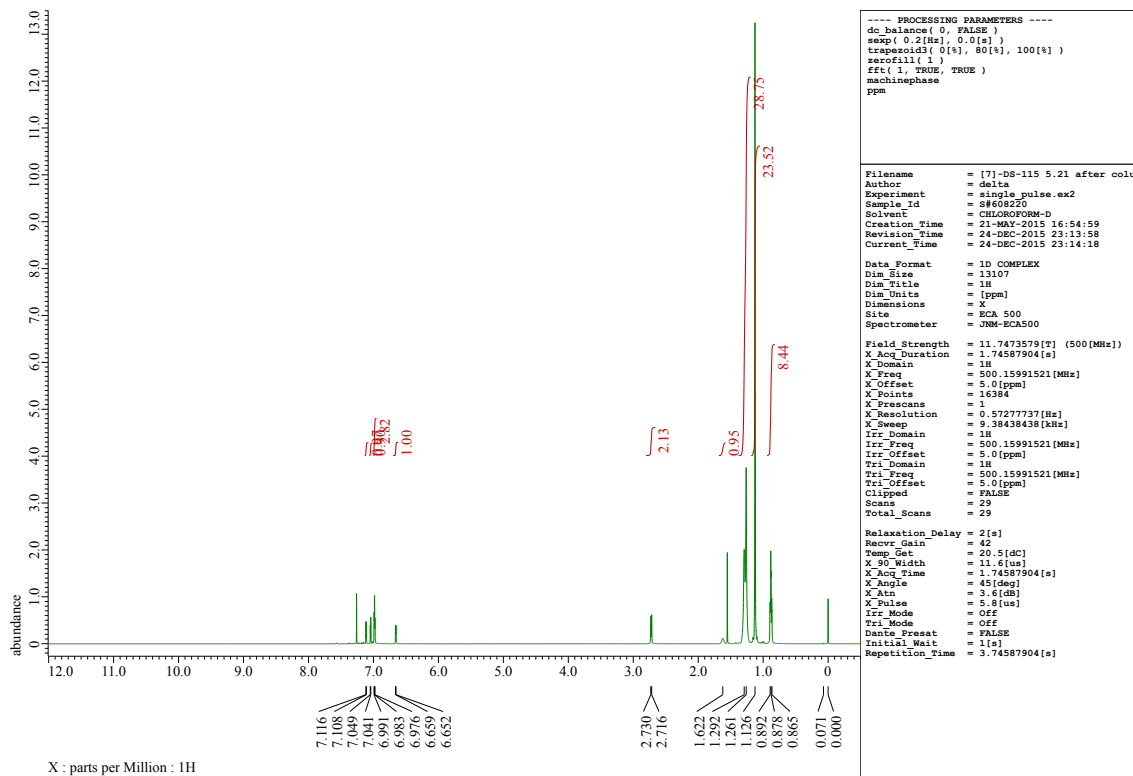

Fig. S21  $^1\text{H}$  NMR ( $\text{CDCl}_3$ , 500 MHz) spectrum of **3g**.

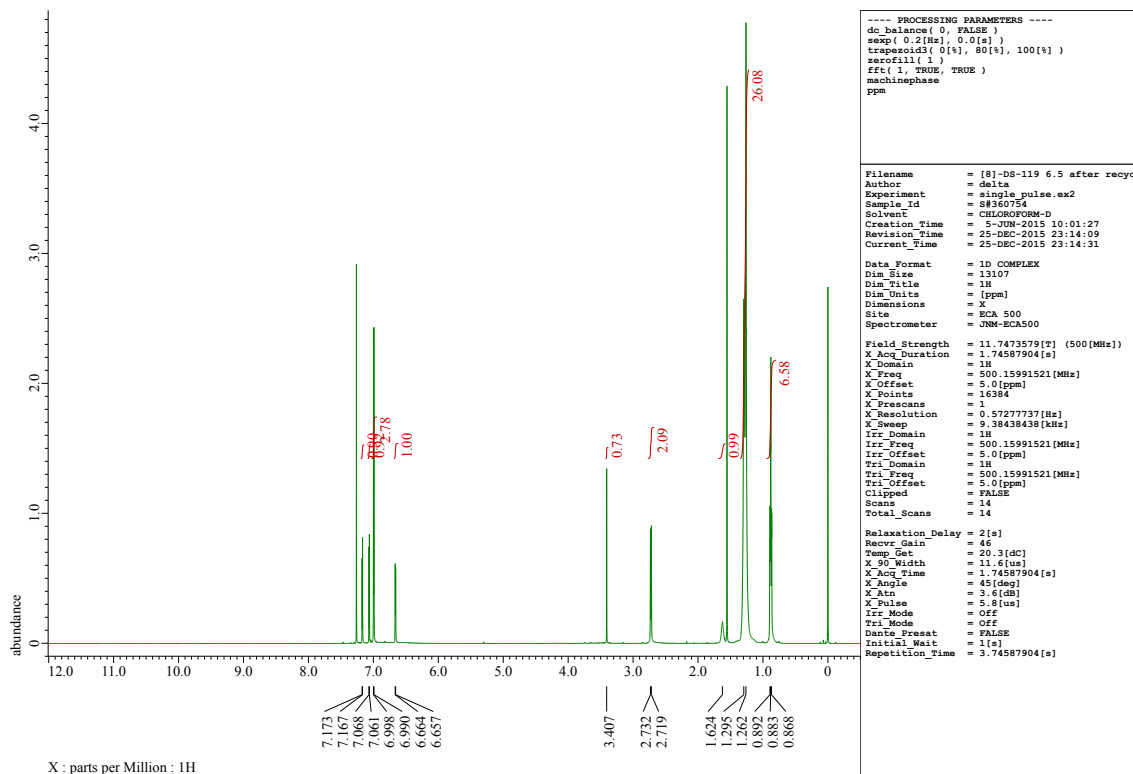

Fig. S22  $^1\text{H}$  NMR ( $\text{CDCl}_3$ , 500 MHz) spectrum of **3**.

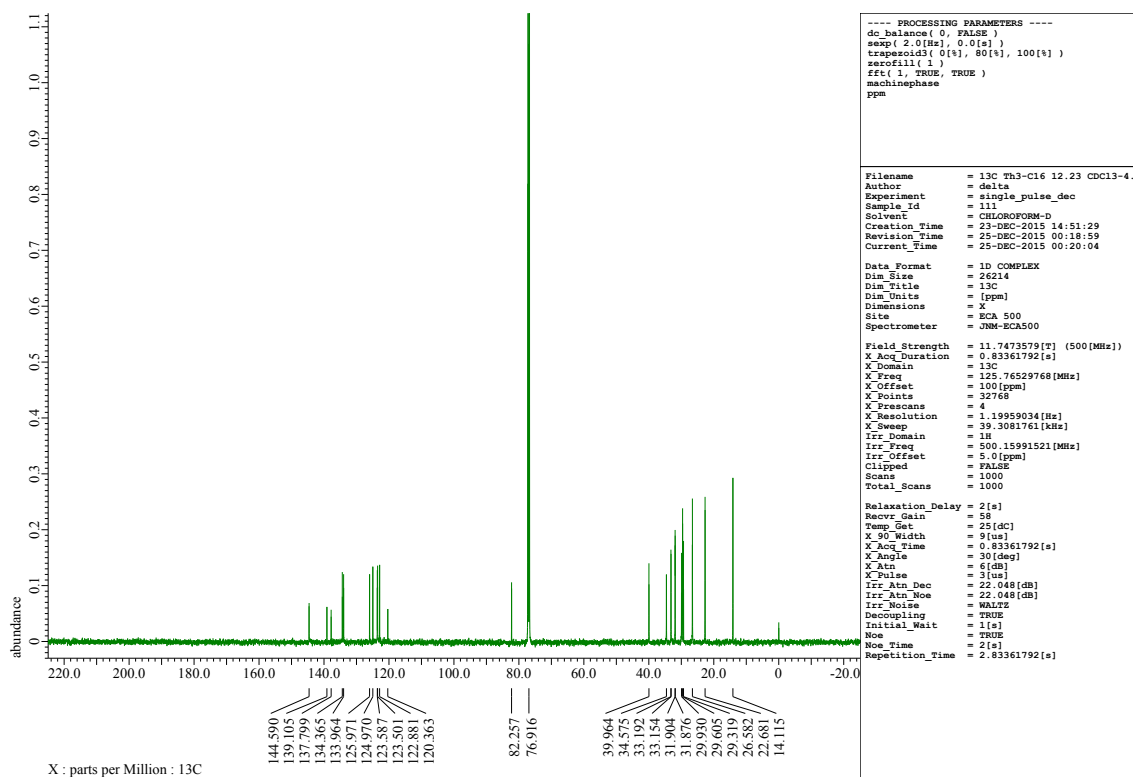

Fig. S23  $^{13}\text{C}$  NMR ( $\text{CDCl}_3$ , 125 MHz) spectrum of **3**.

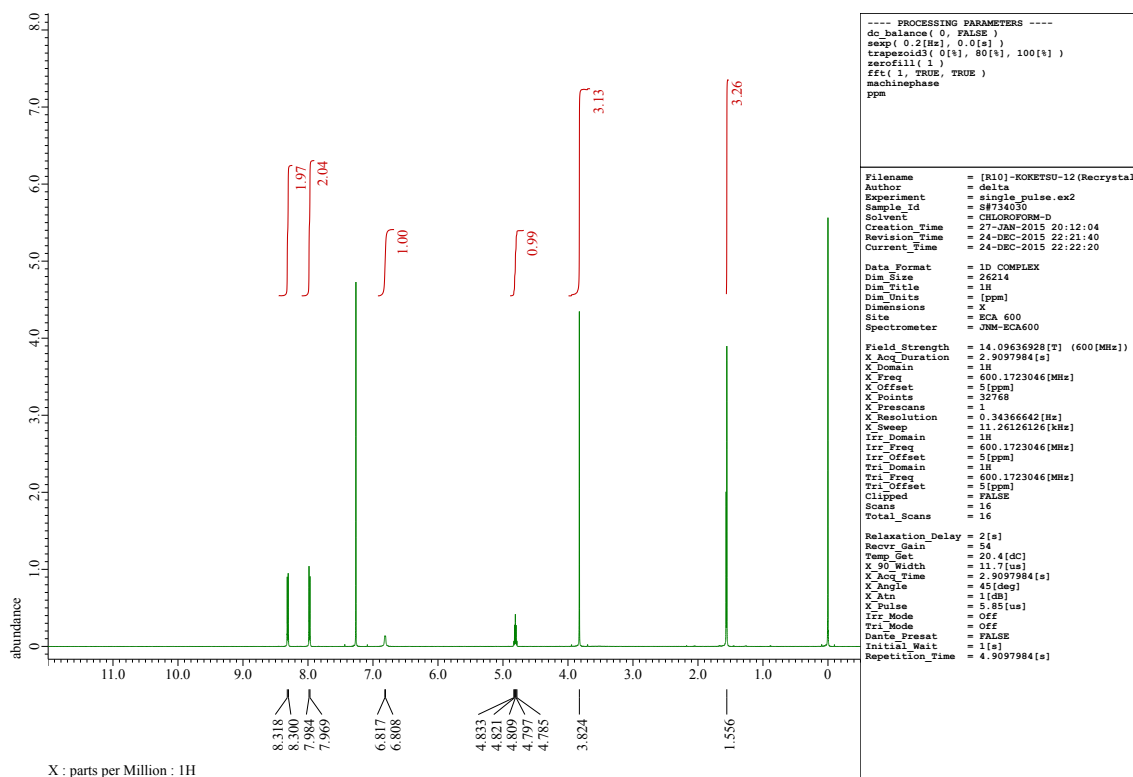

Fig. S24  $^1\text{H}$  NMR ( $\text{CDCl}_3$ , 600 MHz) spectrum of (*R*)-**5a**.

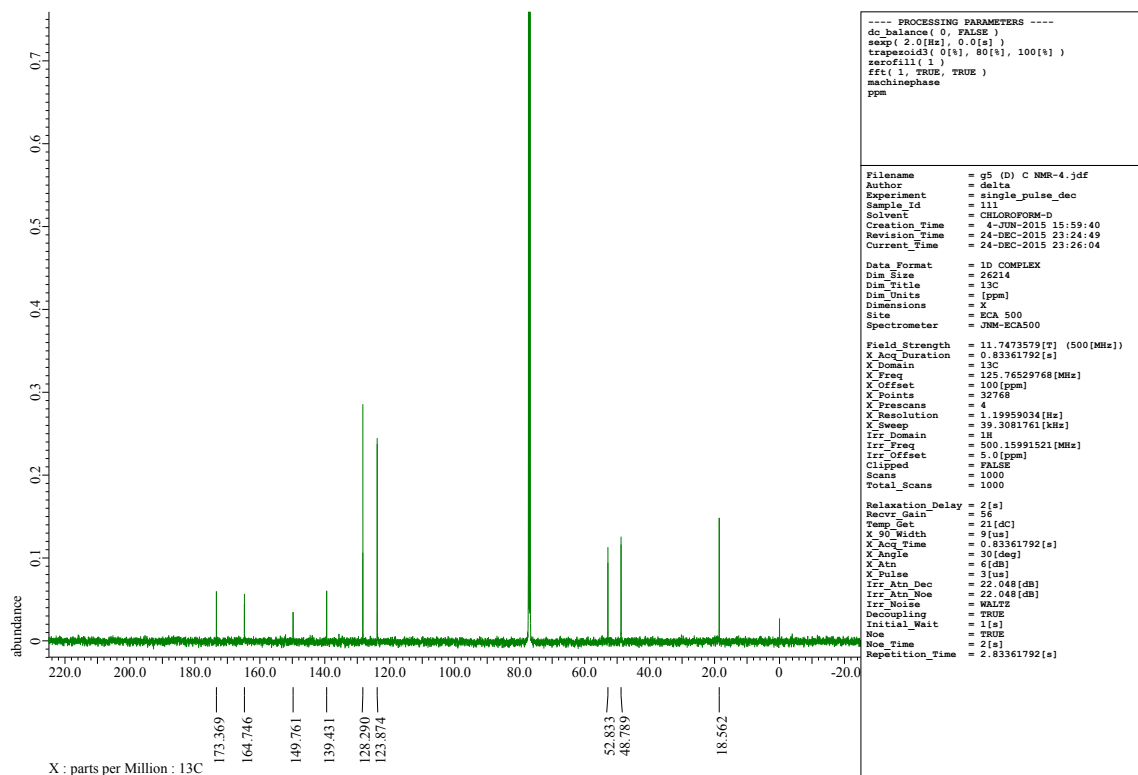

Fig. S25  $^{13}\text{C}$  NMR ( $\text{CDCl}_3$ , 125 MHz) spectrum of (*R*)-**5a**.

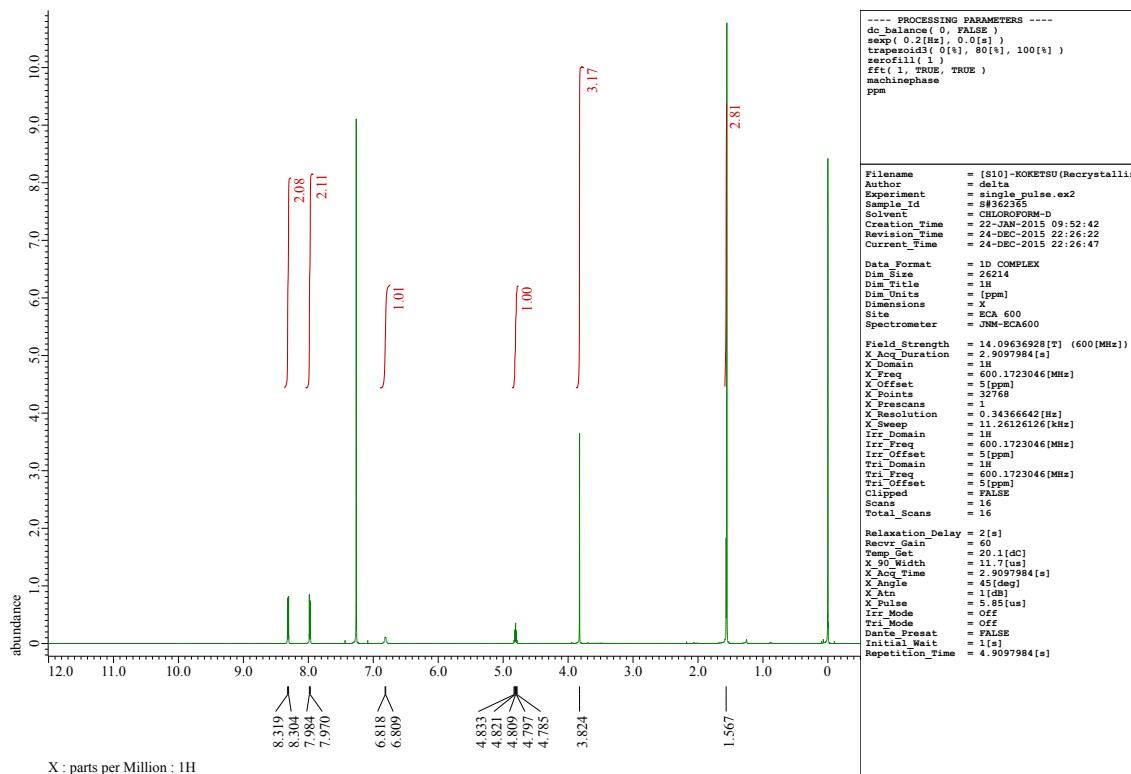

Fig. S26  $^1\text{H}$  NMR ( $\text{CDCl}_3$ , 600 MHz) spectrum of (*S*)-**5a**.

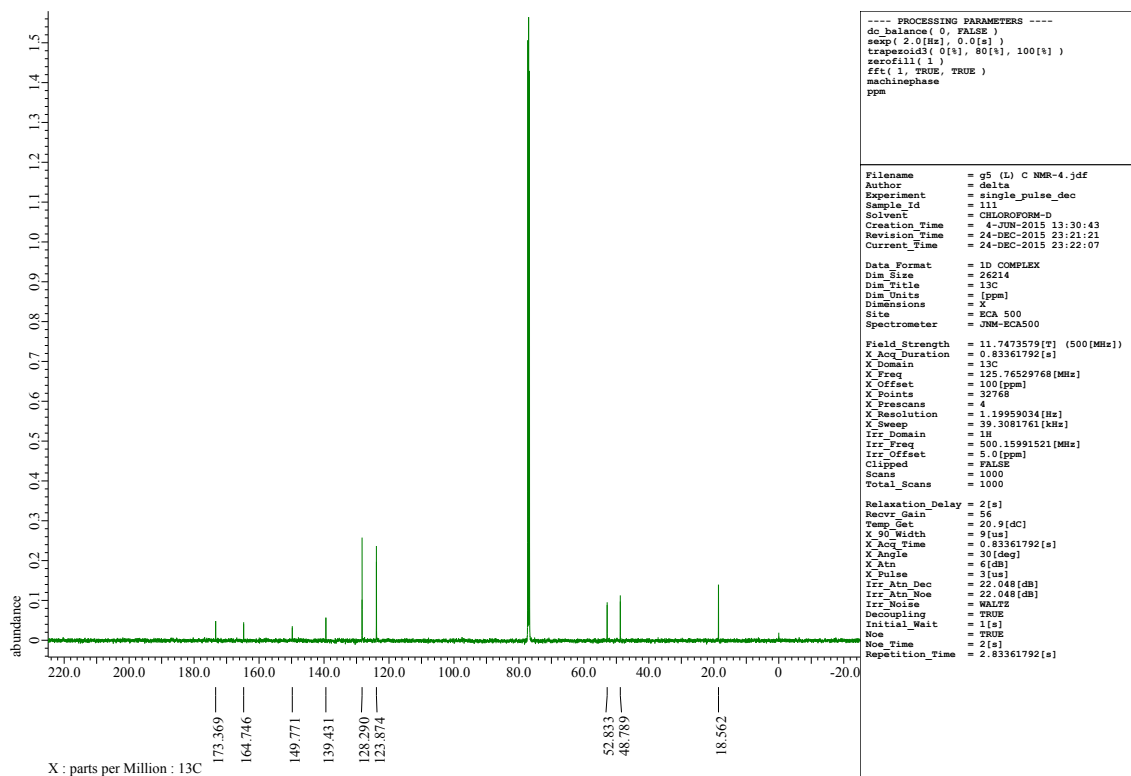

Fig. S27  $^{13}\text{C}$  NMR ( $\text{CDCl}_3$ , 125 MHz) spectrum of (*S*)-**5a**.

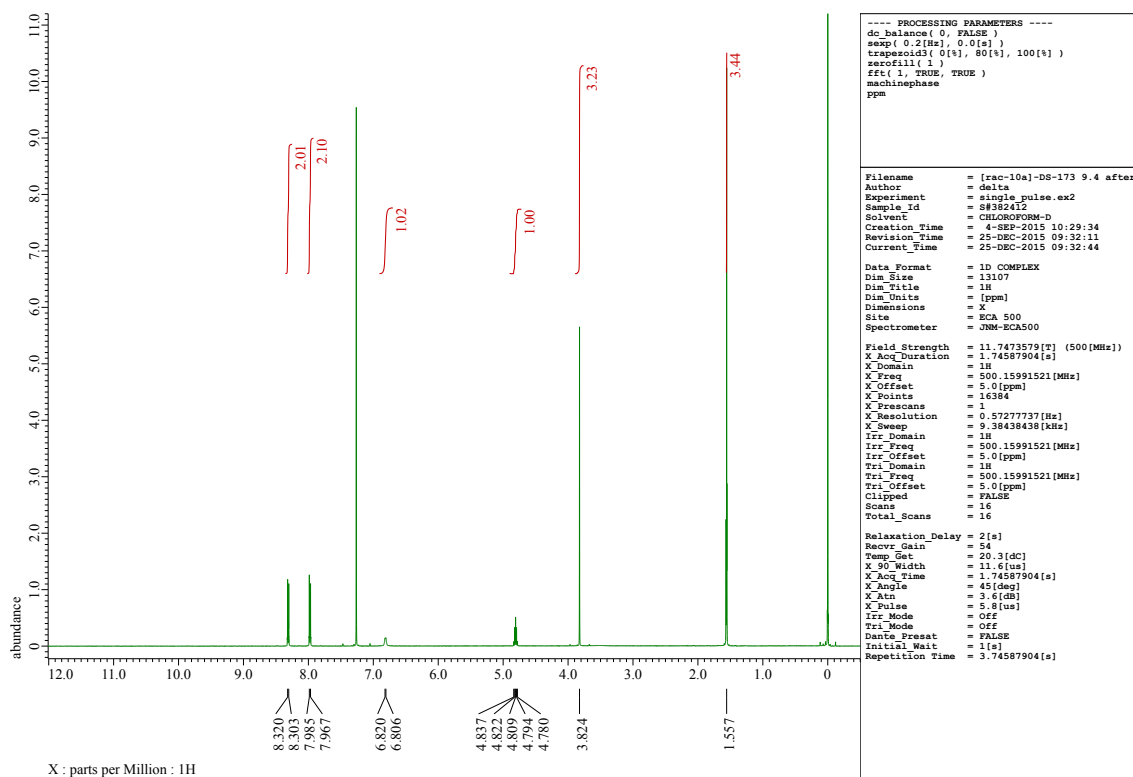

Fig. S28  $^1\text{H}$  NMR ( $\text{CDCl}_3$ , 500 MHz) spectrum of *rac*-5a.

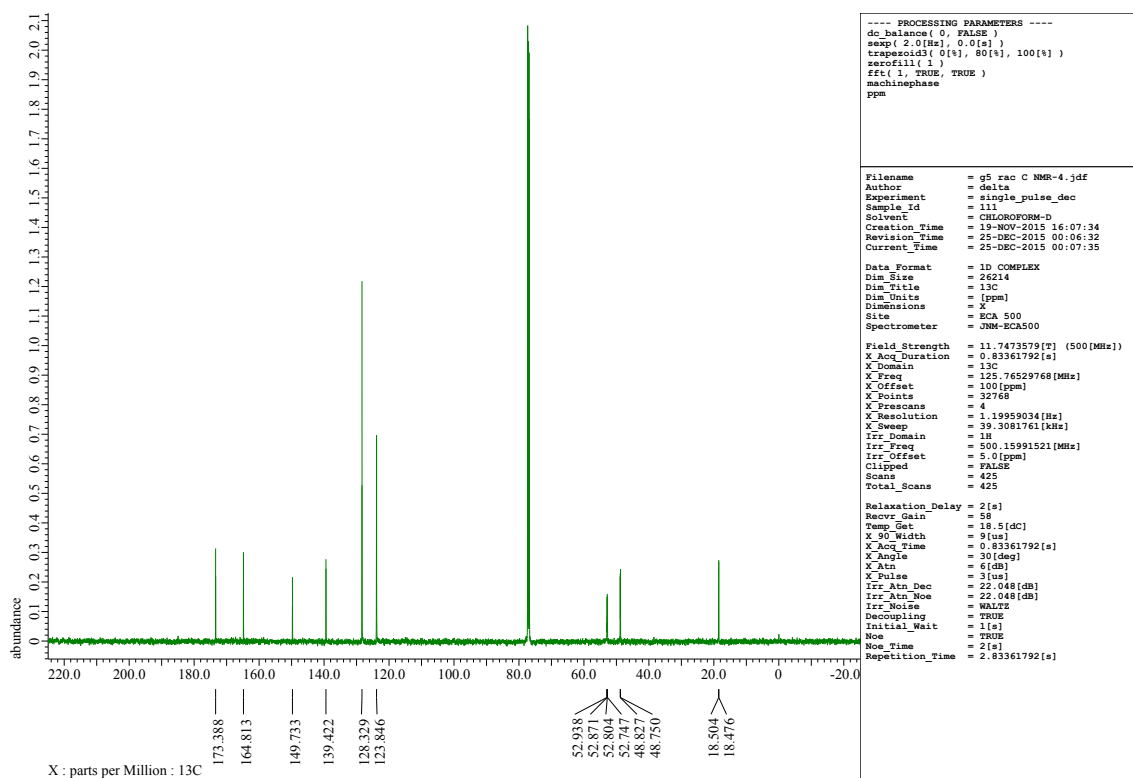

Fig. S29  $^{13}\text{C}$  NMR ( $\text{CDCl}_3$ , 125 MHz) spectrum of *rac*-5a.



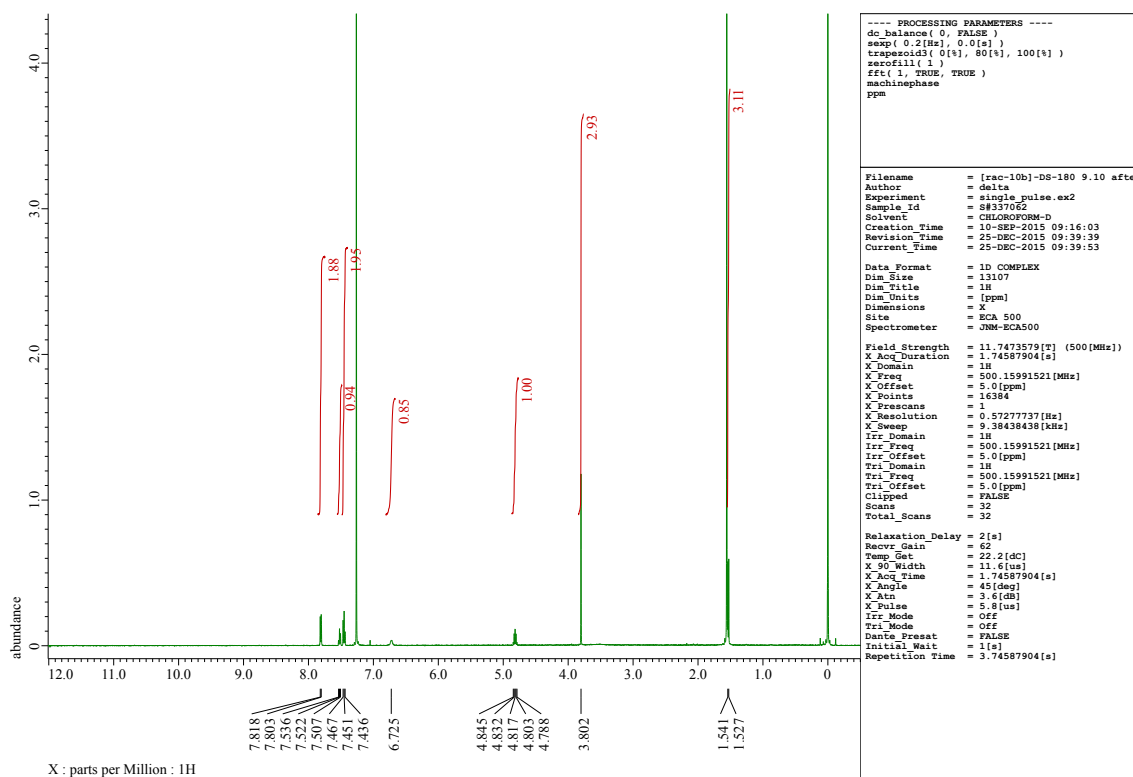

Fig. S30  $^1\text{H}$  NMR ( $\text{CDCl}_3$ , 500 MHz) spectrum of *rac*-5b.

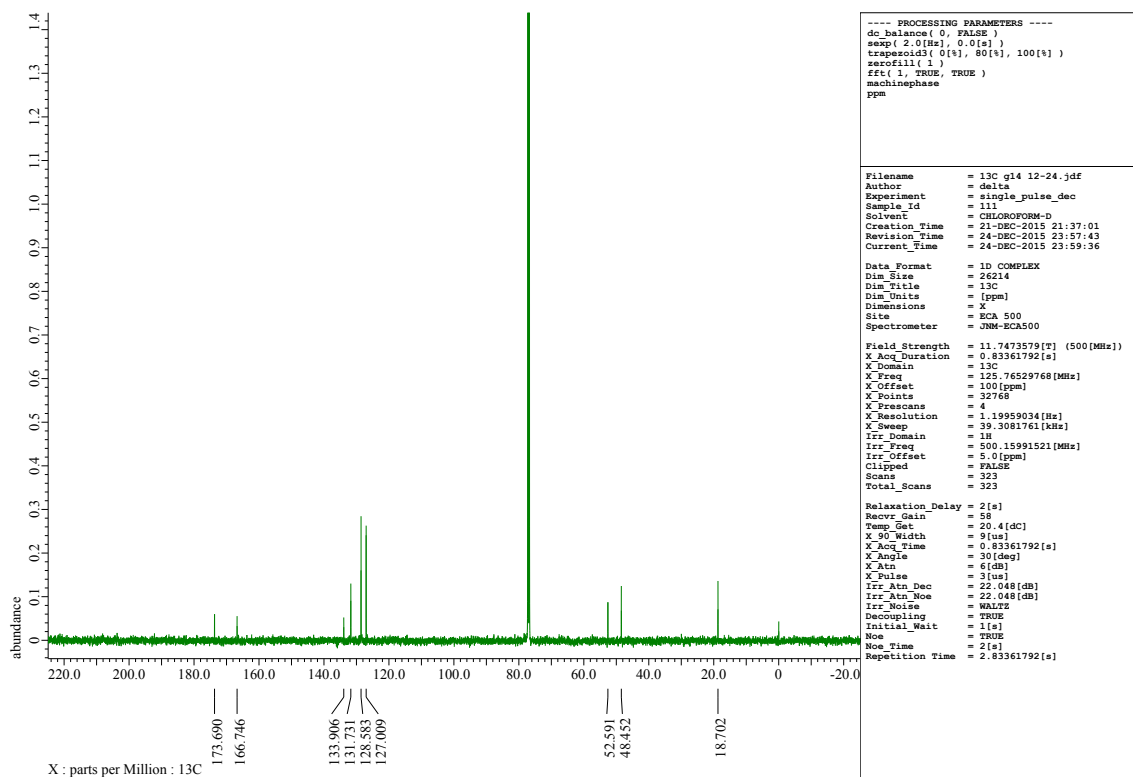

Fig. S31  $^{13}\text{C}$  NMR ( $\text{CDCl}_3$ , 125 MHz) spectrum of *rac*-5b.

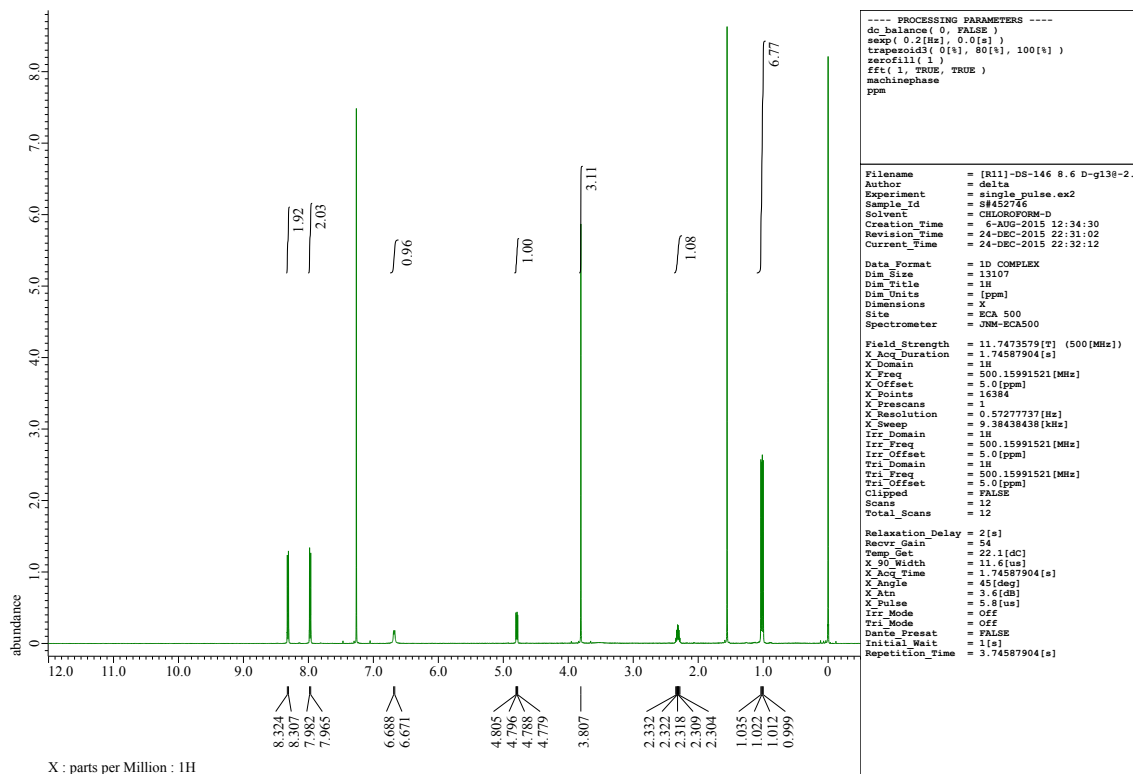

Fig. S32  $^1\text{H}$  NMR ( $\text{CDCl}_3$ , 500 MHz) spectrum of (*R*)-6.

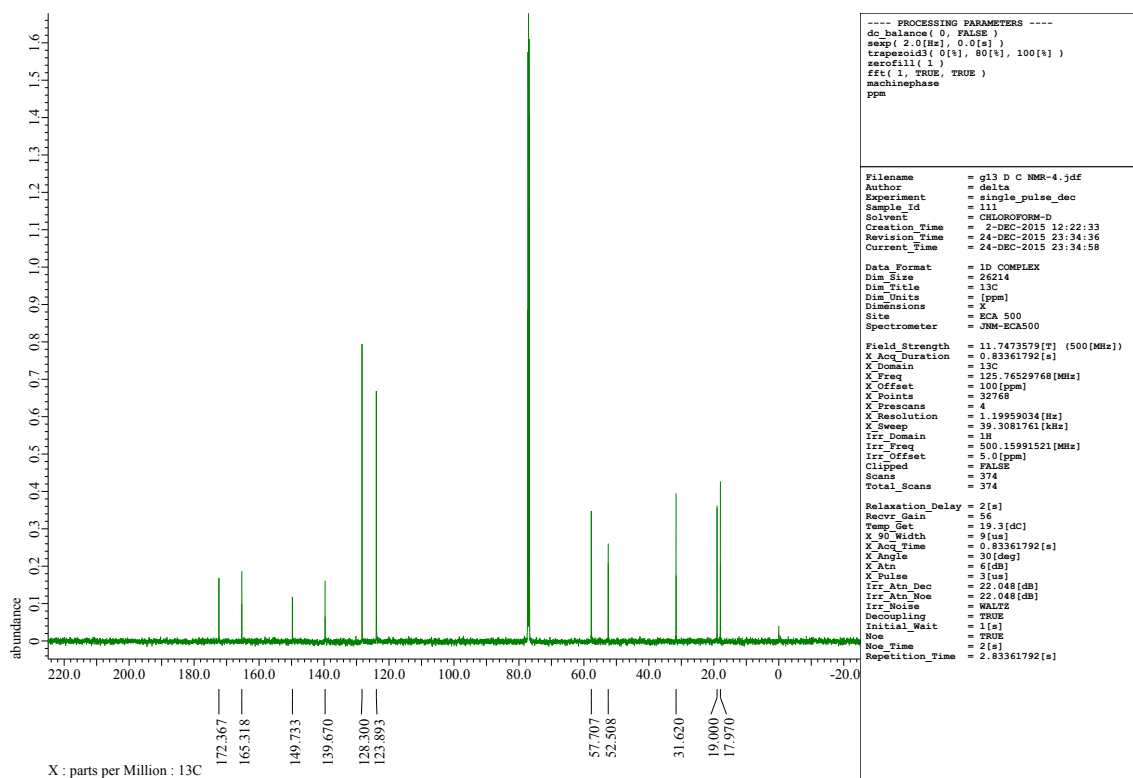

Fig. S33  $^{13}\text{C}$  NMR ( $\text{CDCl}_3$ , 125 MHz) spectrum of (*R*)-6.

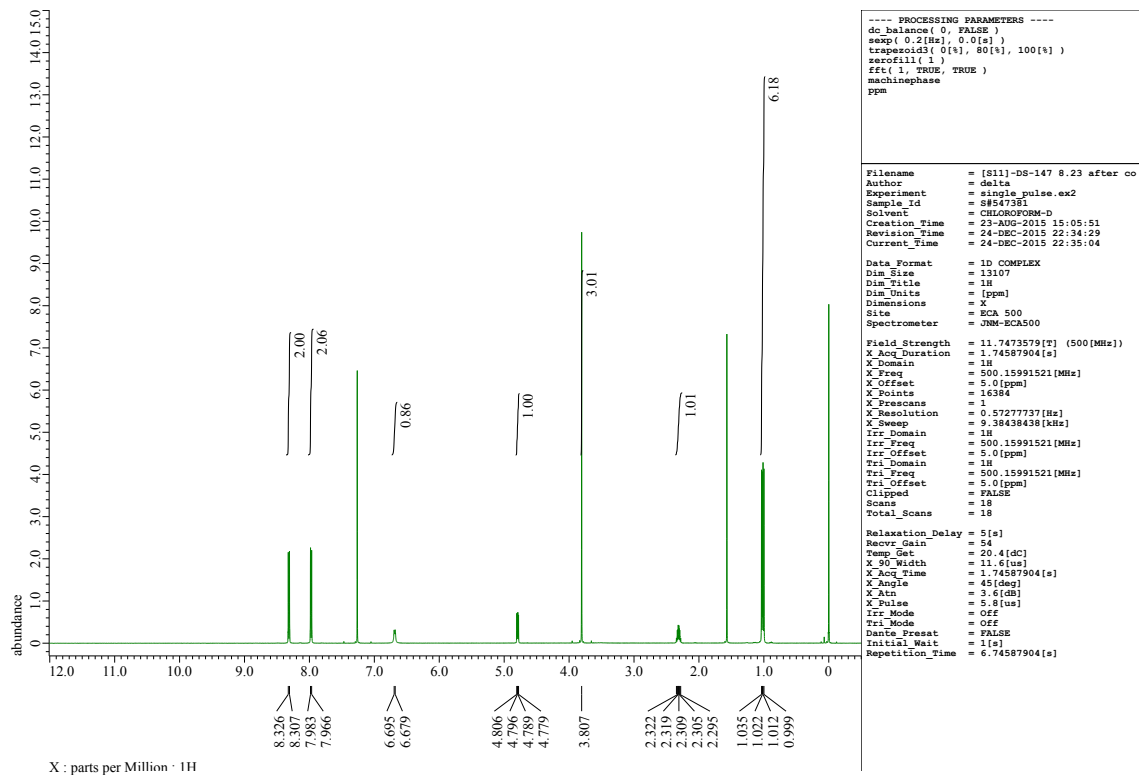

Fig. S34  $^1\text{H}$  NMR ( $\text{CDCl}_3$ , 500 MHz) spectrum of (S)-6.

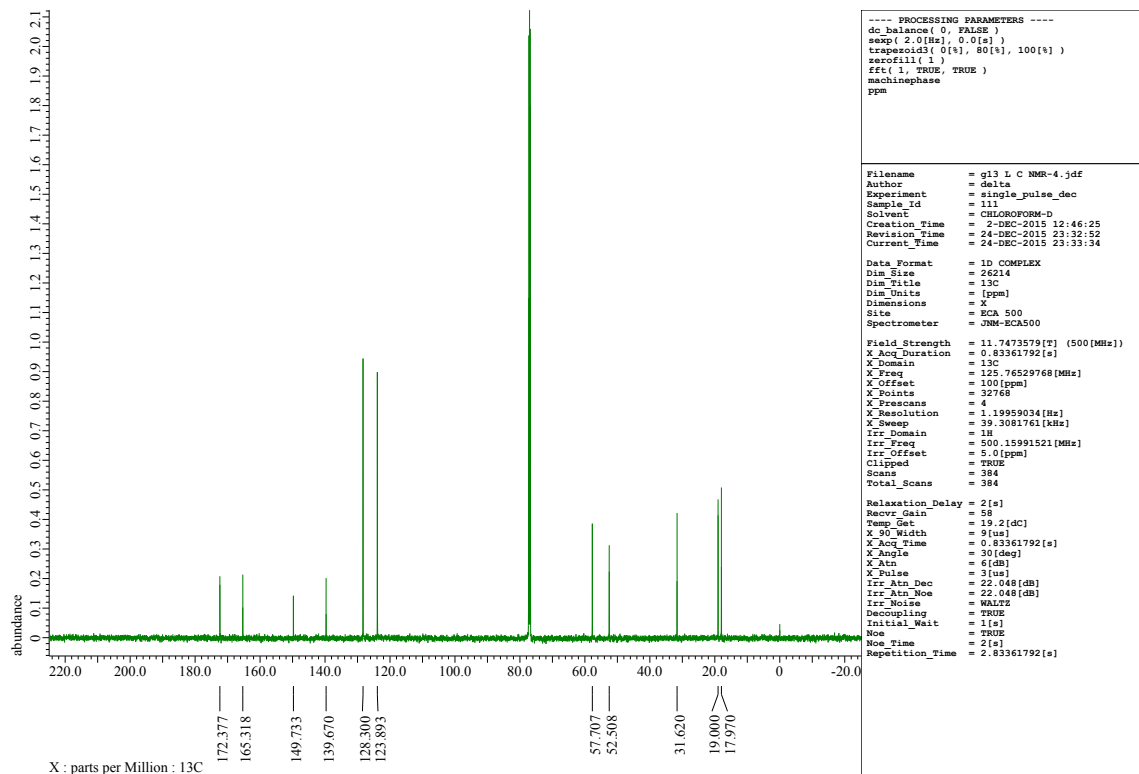

Fig. S35  $^{13}\text{C}$  NMR ( $\text{CDCl}_3$ , 125 MHz) spectrum of (S)-6.

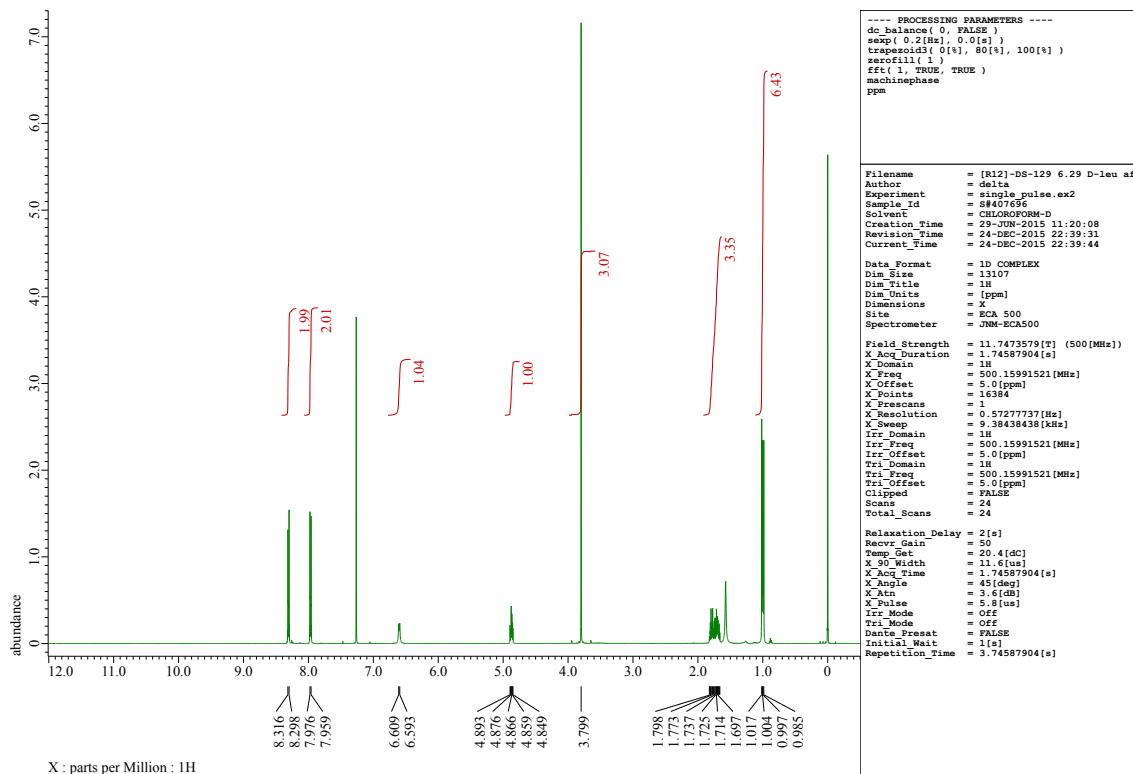

Fig. S36  $^1\text{H}$  NMR ( $\text{CDCl}_3$ , 500 MHz) spectrum of (*R*)-7.

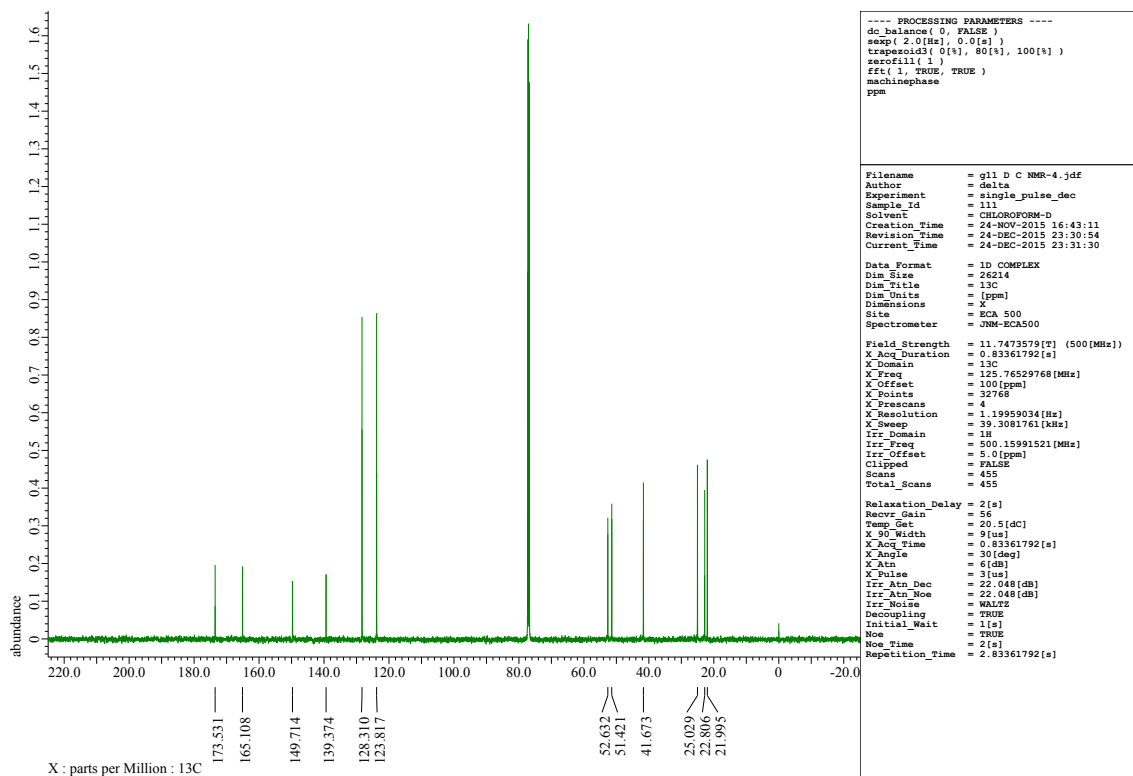

Fig. S37  $^{13}\text{C}$  NMR ( $\text{CDCl}_3$ , 125 MHz) spectrum of (*R*)-7.

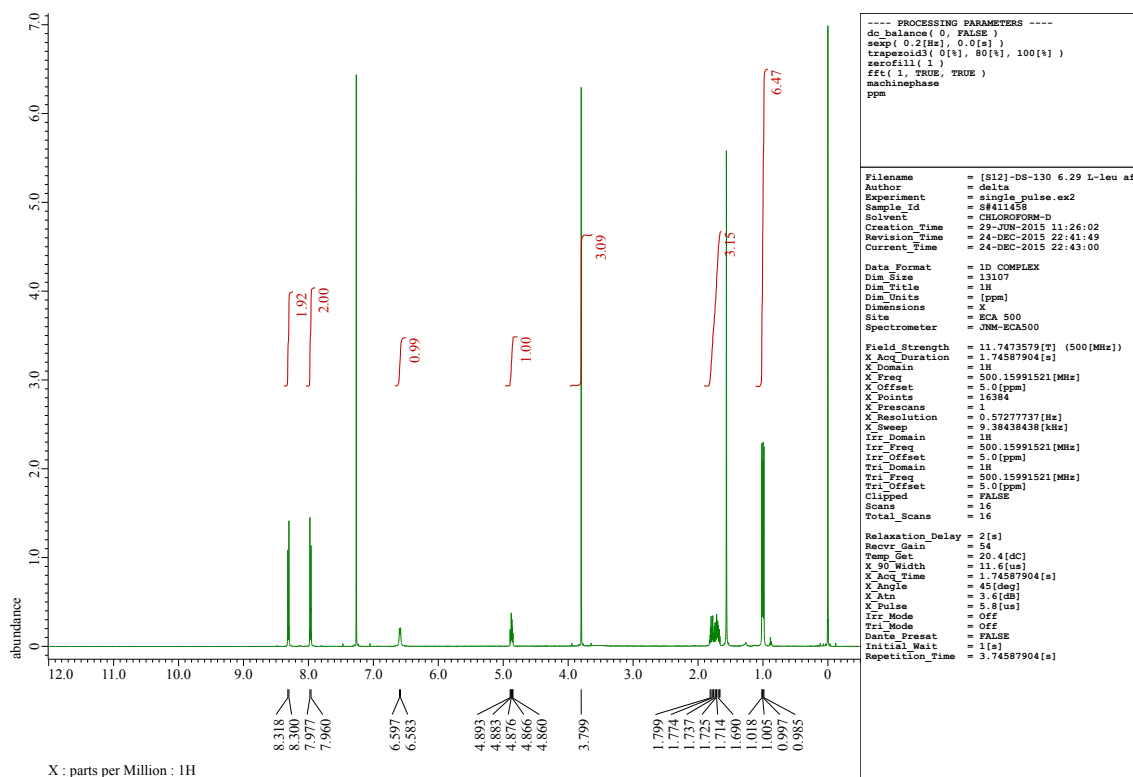

Fig. S38  $^1\text{H}$  NMR ( $\text{CDCl}_3$ , 500 MHz) spectrum of (*S*)-7.

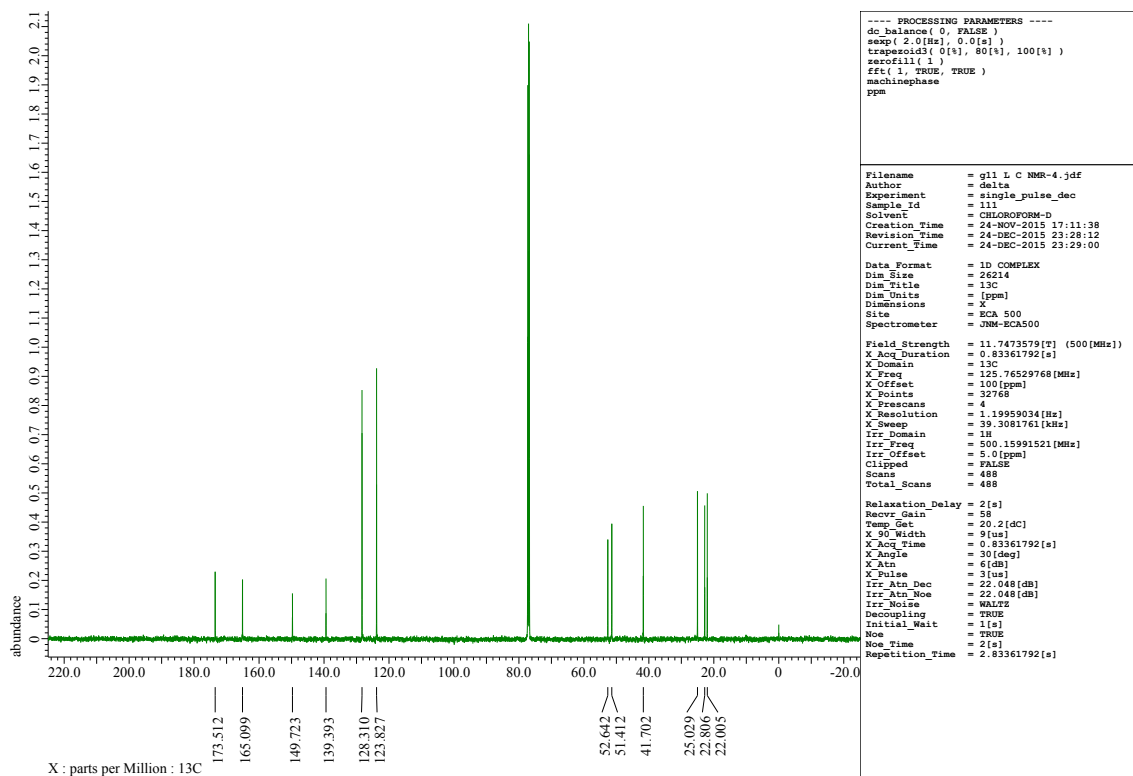

Fig. S39  $^{13}\text{C}$  NMR ( $\text{CDCl}_3$ , 125 MHz) spectrum of (*S*)-7.

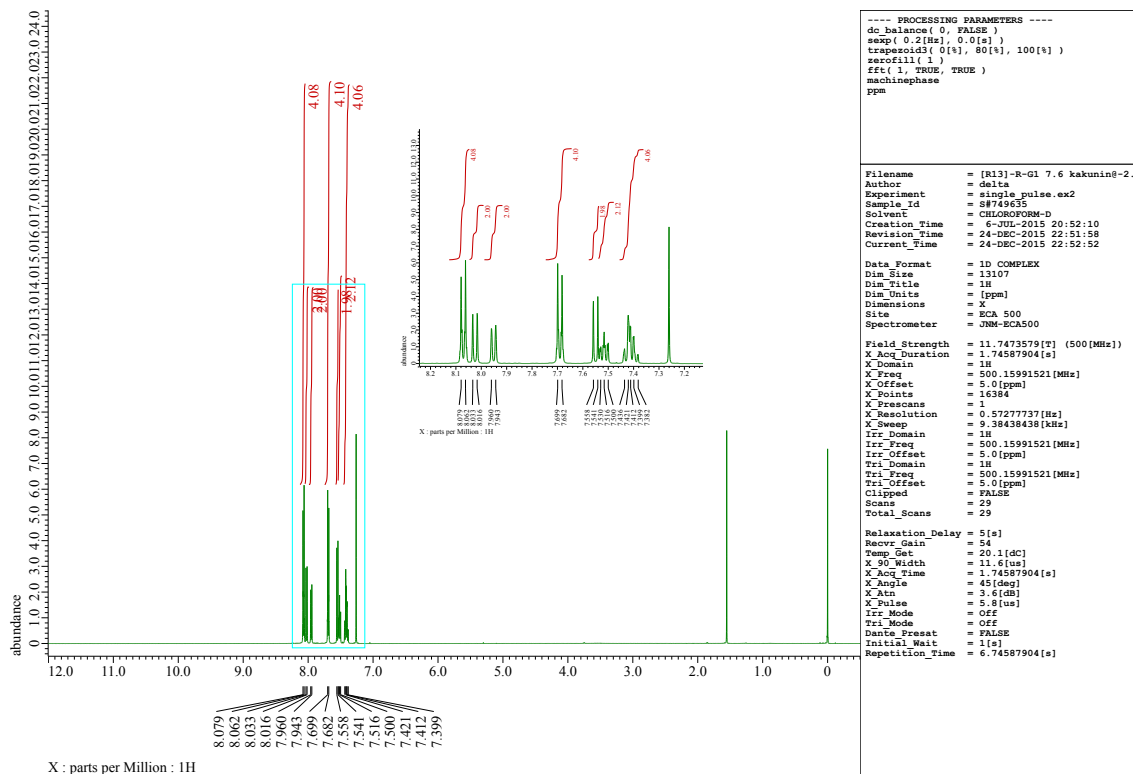

Fig. S40  $^1\text{H}$  NMR ( $\text{CDCl}_3$ , 500 MHz) spectrum of (*R*)-**8a**.

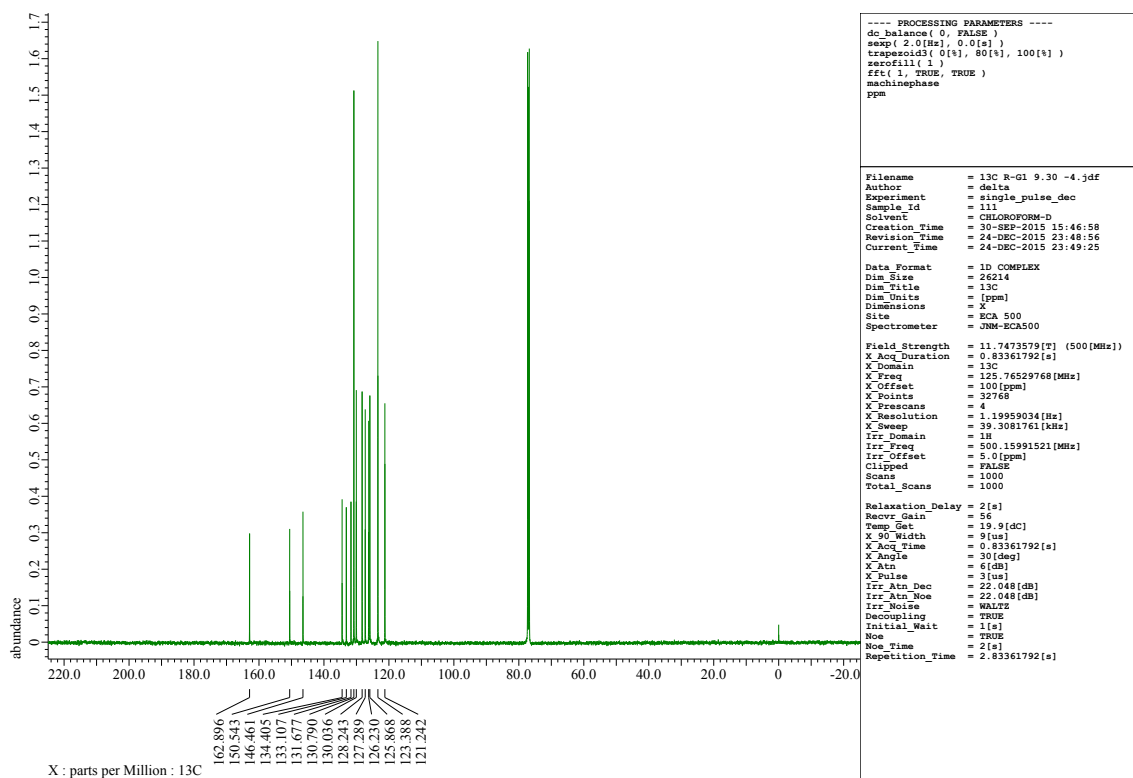

Fig. S41  $^{13}\text{C}$  NMR ( $\text{CDCl}_3$ , 125 MHz) spectrum of (*R*)-**8a**.

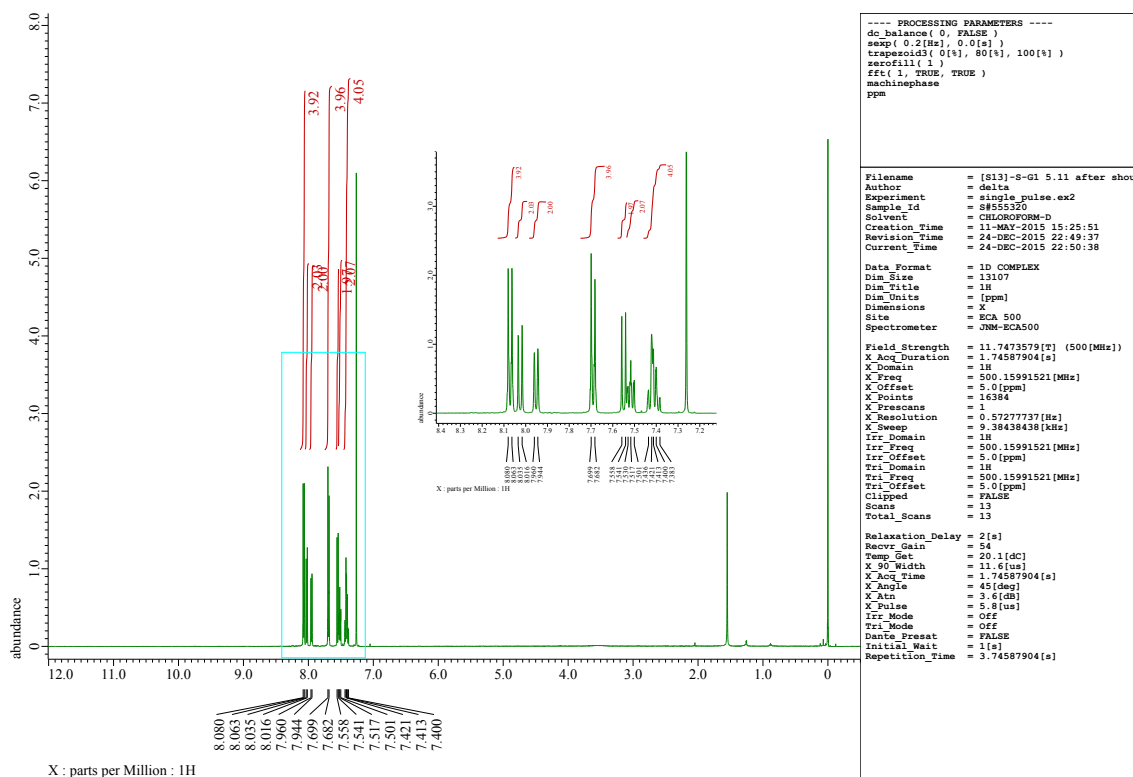

Fig. S42 <sup>1</sup>H NMR (CDCl<sub>3</sub>, 500 MHz) spectrum of (*S*)-8a.

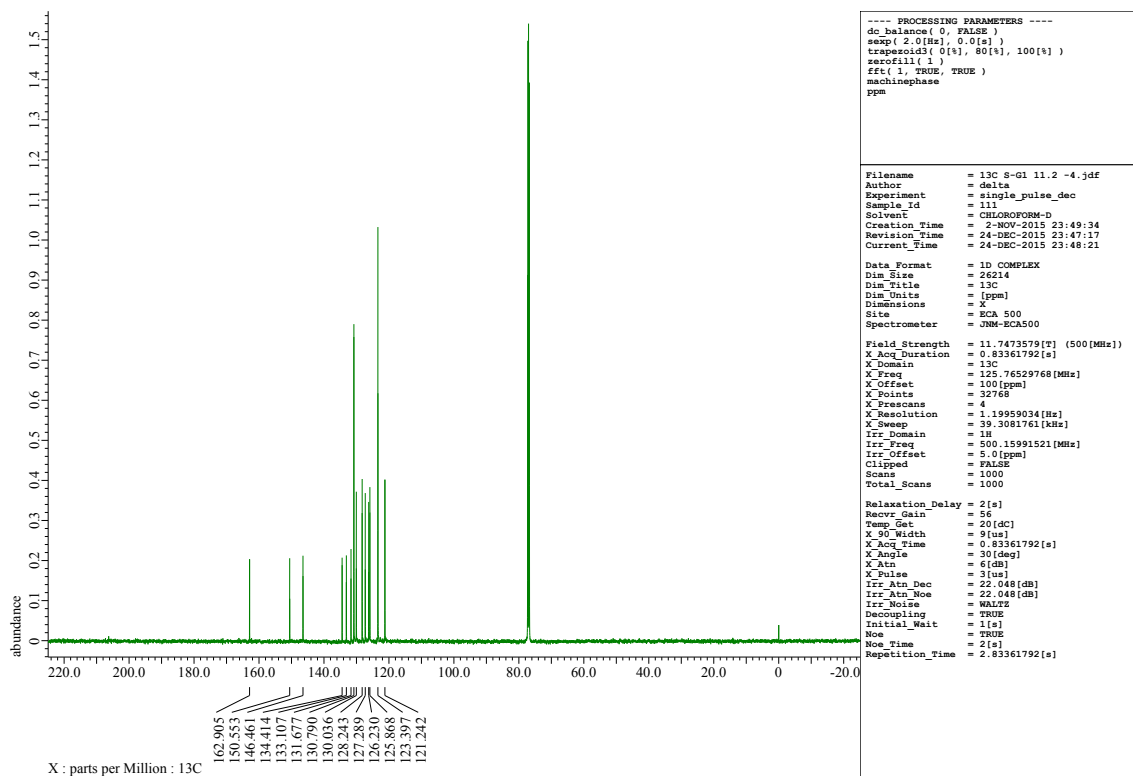

Fig. S43 <sup>13</sup>C NMR (CDCl<sub>3</sub>, 125 MHz) spectrum of (*S*)-8a.

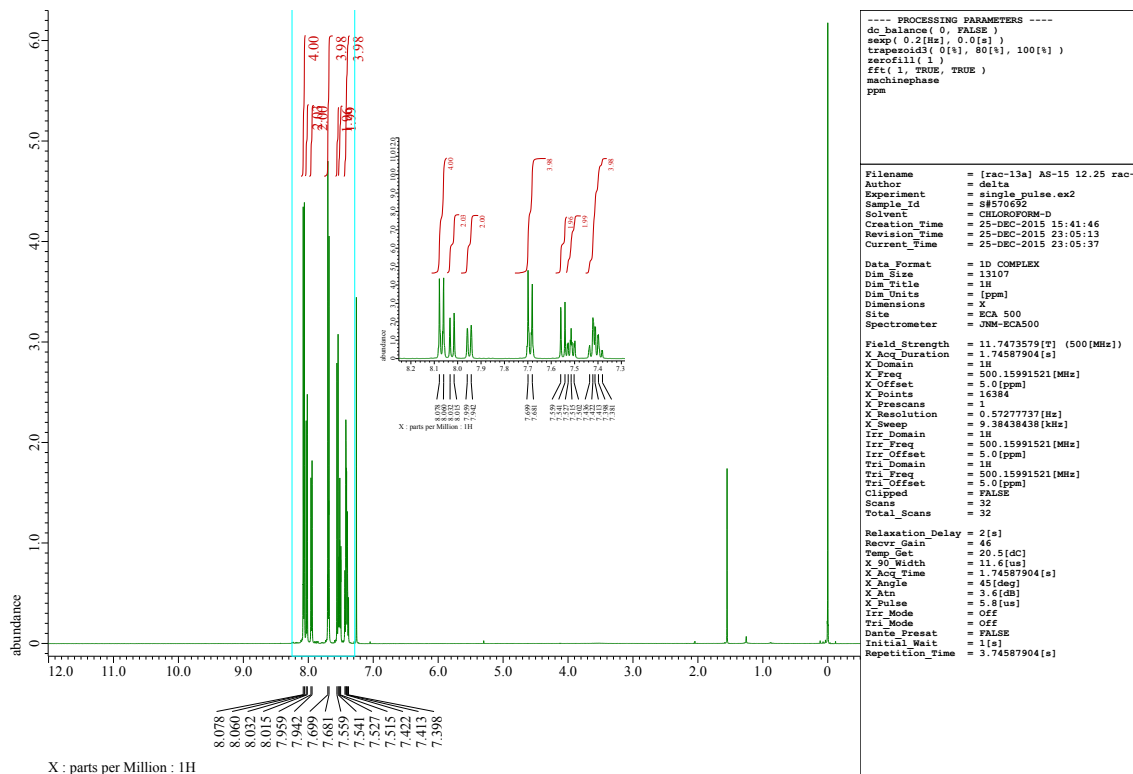

Fig. S44  $^1\text{H}$  NMR ( $\text{CDCl}_3$ , 500 MHz) spectrum of *rac*-8a.

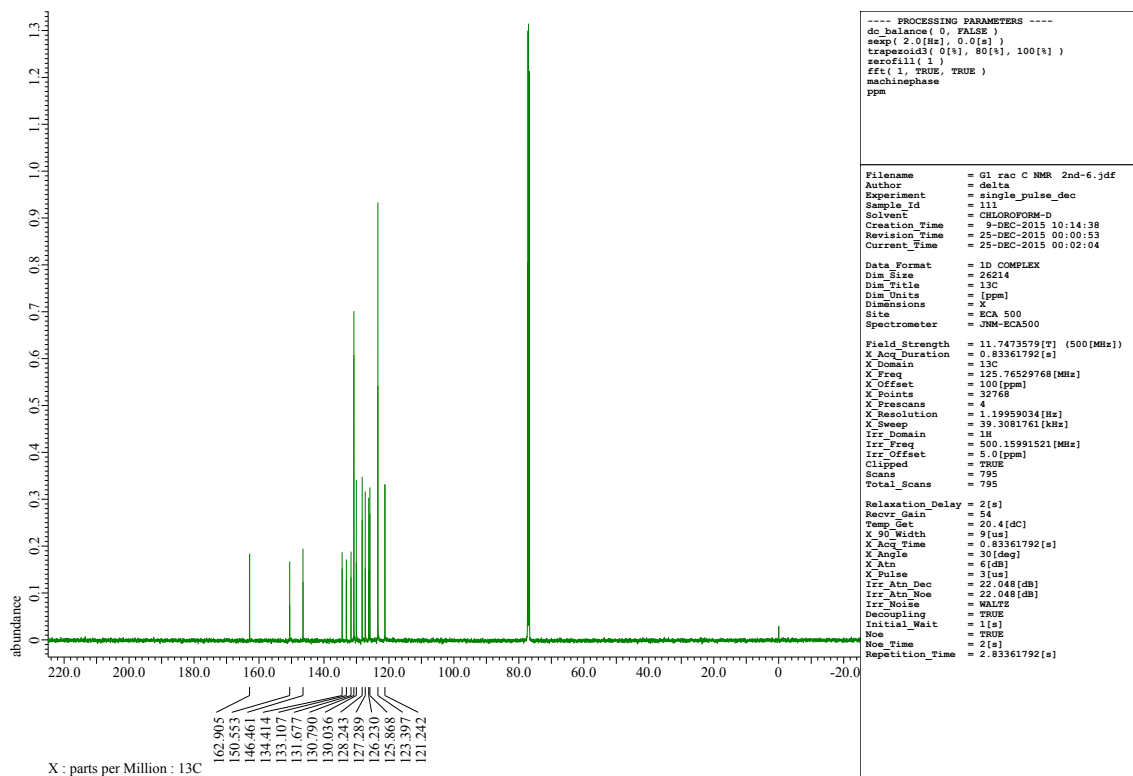

Fig. S45  $^{13}\text{C}$  NMR ( $\text{CDCl}_3$ , 125 MHz) spectrum of *rac*-8a.



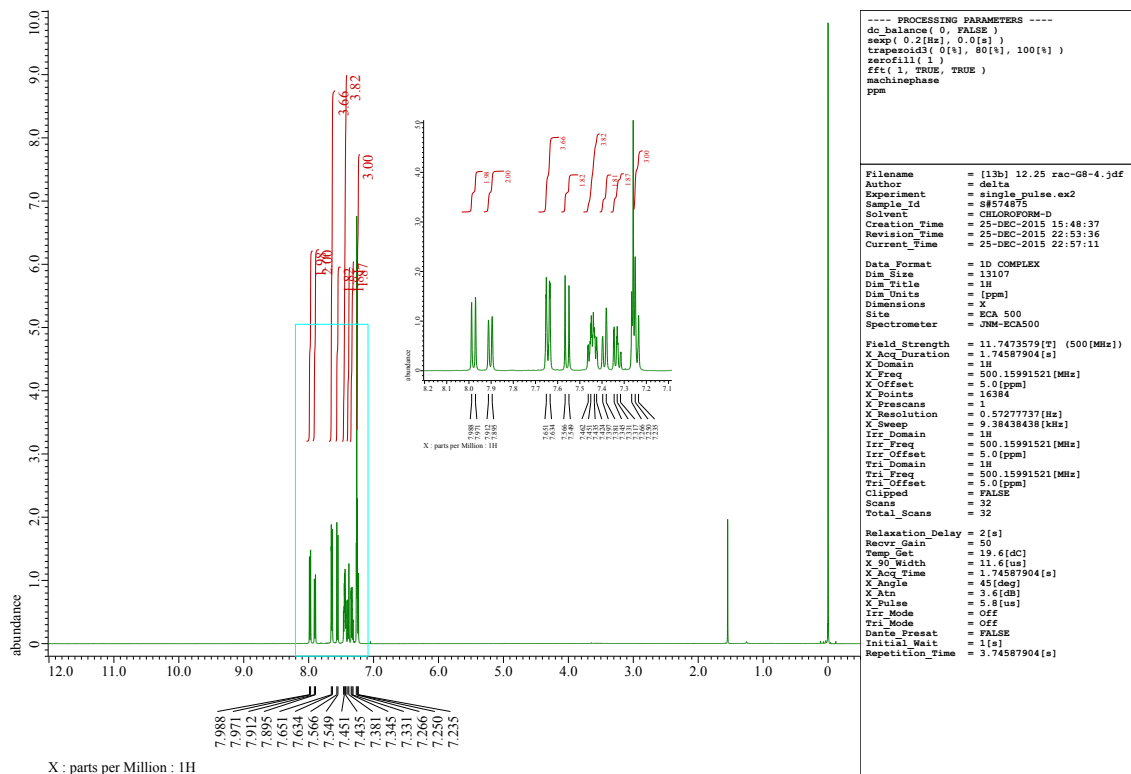

Fig. S46 <sup>1</sup>H NMR (CDCl<sub>3</sub>, 500 MHz) spectrum of *rac*-8b.

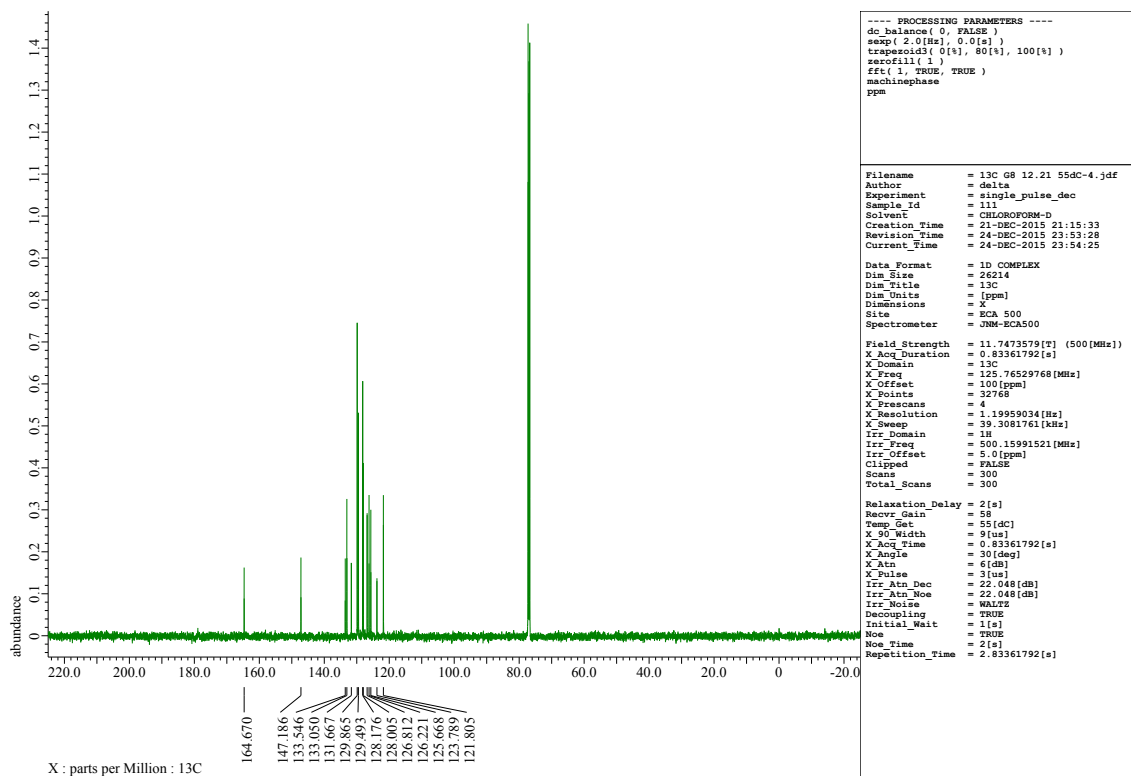

Fig. S47 <sup>13</sup>C NMR (CDCl<sub>3</sub>, 125 MHz) spectrum of *rac*-8b.

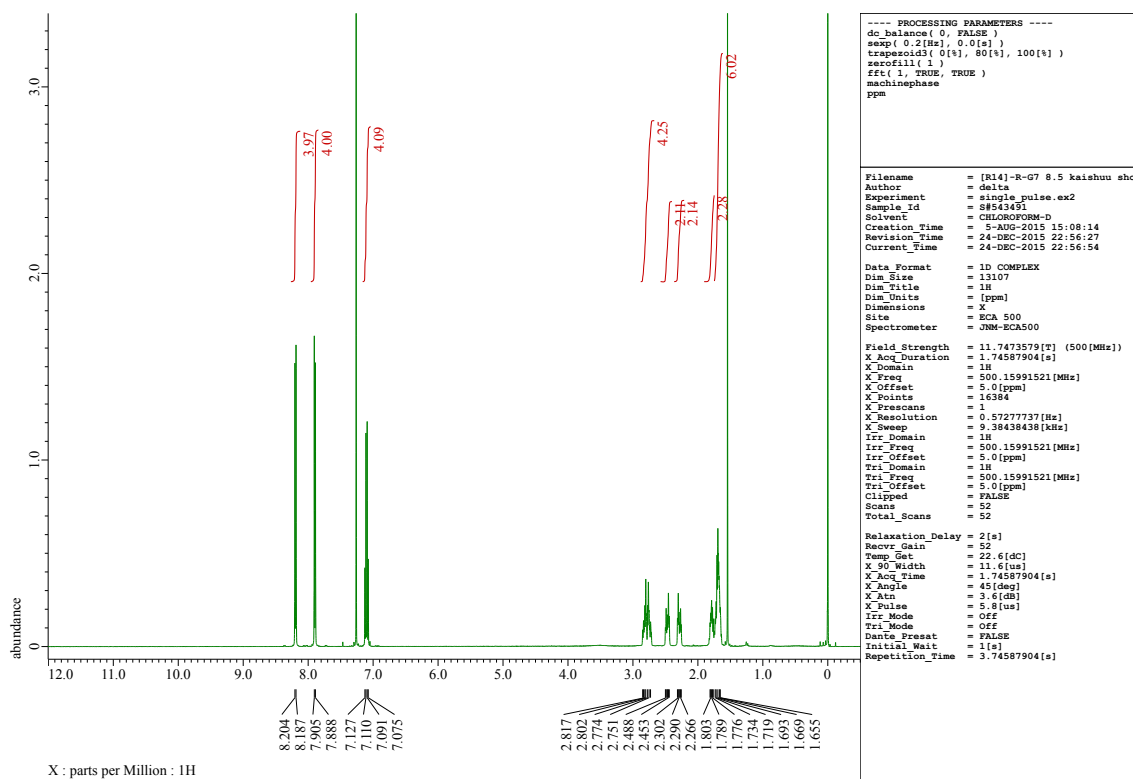

Fig. S48  $^1\text{H}$  NMR ( $\text{CDCl}_3$ , 500 MHz) spectrum of (R)-9.

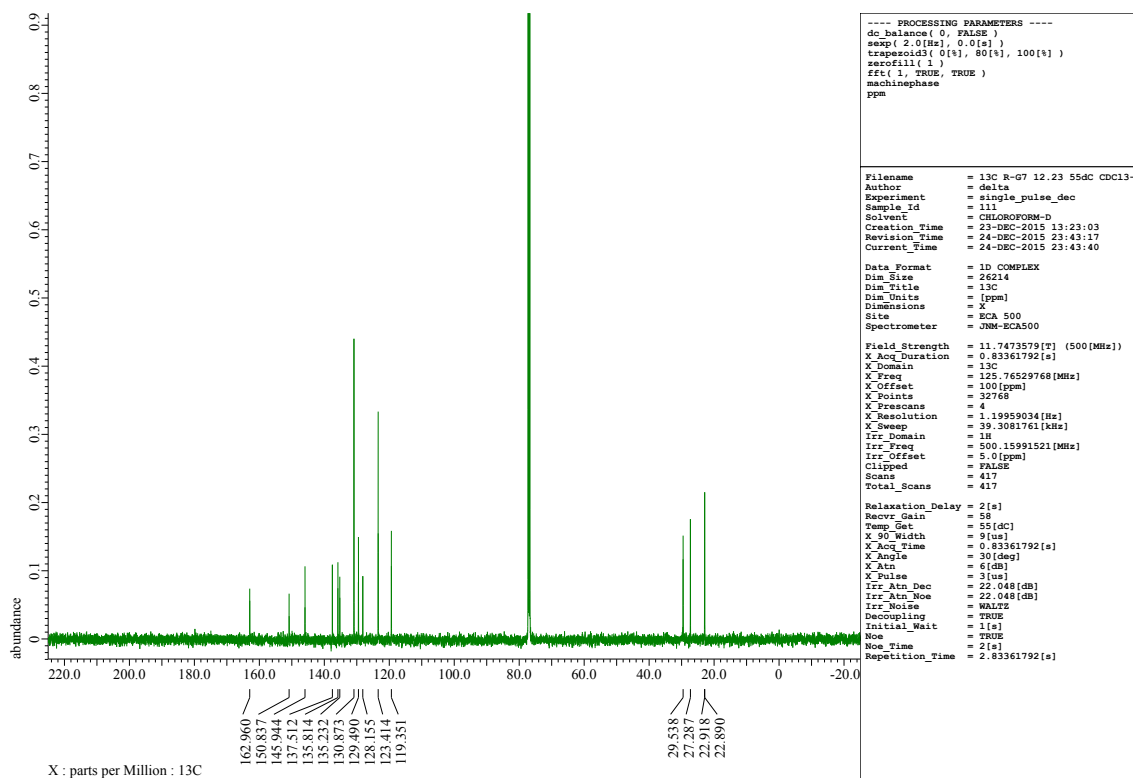

Fig. S49  $^{13}\text{C}$  NMR ( $\text{CDCl}_3$ , 125 MHz) spectrum of (R)-9.

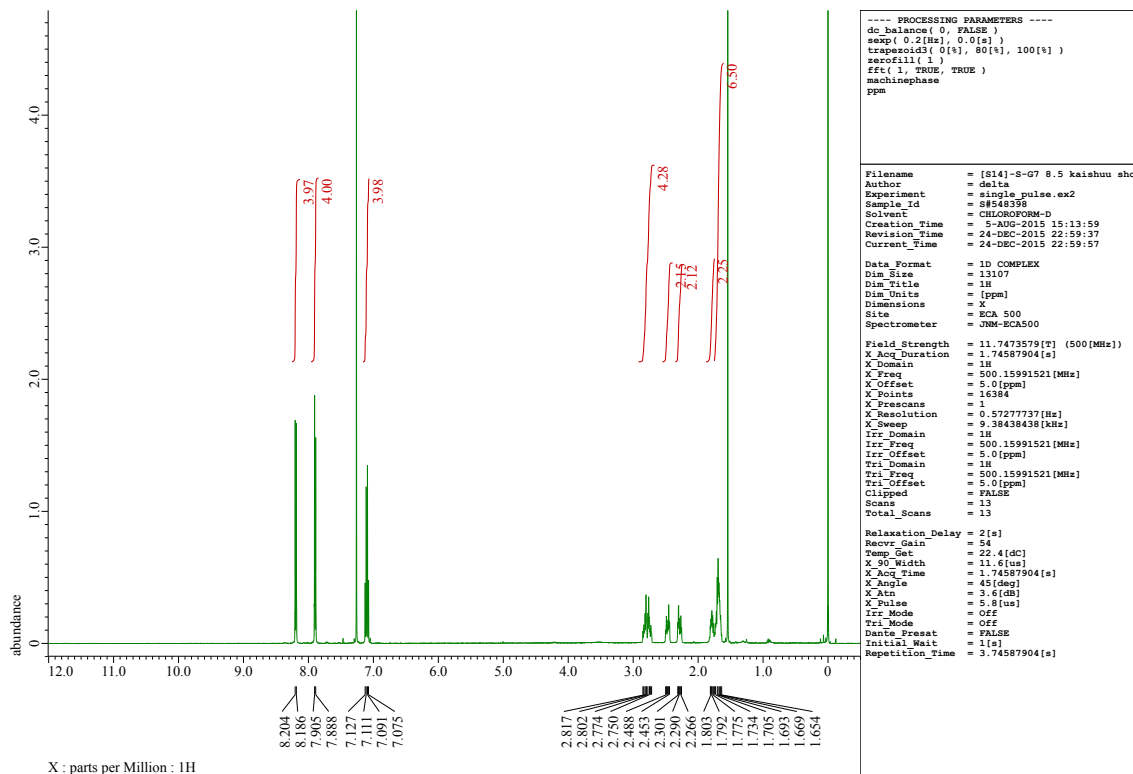

Fig. S50  $^1\text{H}$  NMR ( $\text{CDCl}_3$ , 500 MHz) spectrum of (*S*)-9.

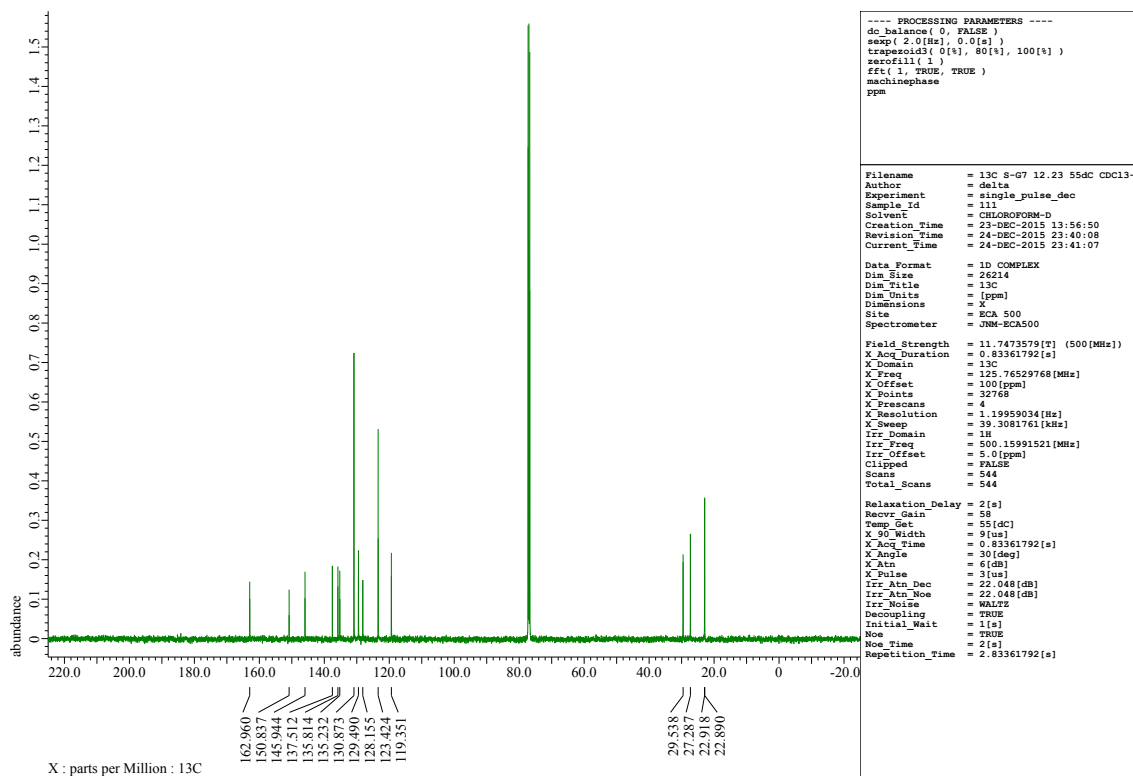

Fig. S51  $^{13}\text{C}$  NMR ( $\text{CDCl}_3$ , 125 MHz) spectrum of (*S*)-9.

## Reference

1. J. Zhou, Y. Zuo, X. Wan, G. Long, Q. Zhang, W. Ni, Y. Liu, Z. Li, G. He, C. Li, B. Kan, M. Li and Y. Chen, *J. Am. Chem. Soc.*, 2013, **135**, 8484-8487.
